# Supplementary material for: High-performance deep-blue electroluminescence from multi-resonance TADF emitters with a spirofluorene-fused double boron framework
Source: Royal Society of Chemistry journal article supplement (doi:10.1039/d4sc04835k), 2024-01-01
Supplement: d4sc04835k1.pdf [file d4sc04835k1.pdf]

## Supporting Information

### High-Performance Deep-Blue Electroluminescence from Multi-resonance TADF Emitters with Spirofluorene-Fused Double Boron Framework

Ke Xu, Nengquan Li, Zeyuan Ye, Yuxi Guo, Yuxin Wu, Chenghao Gui, Xiaojun Yin, Jingsheng Miao, Xiaosong Cao\*, Chuluo Yang

Shenzhen Key Laboratory of New Information Display and Storage Materials, College of Materials Science and Engineering, Shenzhen University, Shenzhen 518060, China. Email: xcao@szu.edu.cn

### Table of Contents

|                                                         |     |
|---------------------------------------------------------|-----|
| 1. Experimental Section .....                           | S2  |
| 1.1. Materials and Methods .....                        | S2  |
| 1.2. Synthesis .....                                    | S2  |
| 1.3. Single Crystal X-ray Crystallography .....         | S4  |
| 1.4. Quantum Chemical Calculations .....                | S5  |
| 1.5. Thermal and Electrochemical Characterization ..... | S5  |
| 1.6. Photophysical Characterization .....               | S6  |
| 1.7. Analysis of Rate Constants .....                   | S6  |
| 1.8. Device Fabrication and Measurement .....           | S7  |
| 2. Schemes, Figures and Tables .....                    | S8  |
| 3. References .....                                     | S41 |

# 1. Experimental Section

## 1.1. Materials and Methods

All raw materials and anhydrous solvents were commercially available and used without further purification. The reactions were carried out under the protection of the high-purity argon atmosphere. All reactions were heated by metal sand bath (WATTCAS, LAB-500, <https://www.wattcas.com>). NMR measurements were conducted on Bruker Advance 400 (or 500, 600) spectrometer. Tetramethylsilane was used as the internal standard and CDCl<sub>3</sub> or DMSO-*d*<sub>6</sub> as the solvent. The high resolution mass spectrometry (HR-MS) for the compounds was conducted on a Thermo Scientific LTQ Orbitrap XL with ESI ion source.

## 1.2. Synthesis

**Synthesis of 3,5-Dibromo-*N,N*-diphenylaniline (1):** 3,5-Dibromoaniline (5.00 g, 27.90 mmol), CuI (1.00 g, 5.58 mmol), 1,10-Phenanthroline (1.00 g, 5.58 mmol), KOH (12.52 g, 223.2 mmol) were dissolved in 10 mL Iodobenzene at room temperature. After blowing argon for 15 minutes, the reaction was stirred at 110 °C for 12 h. After cooling to room temperature, toluene was removed by rotary evaporation. Subsequently, the resultant crude product underwent purification through the employment of silica gel column chromatography (eluent: petroleum ether/dichloromethane = 6:1, *v/v*), giving the intermediate **1** as a white solid (7.62 g, yield 68.2%). <sup>1</sup>H NMR (400 MHz, CDCl<sub>3</sub>) δ = 7.30 (t, *J*=7.9, 4H), 7.19 (t, *J*=1.6, 1H), 7.14 – 7.07 (m, 7H), 7.05 (d, *J*=1.6, 2H).

**Synthesis of *N1,N3*-dimesityl-*N5,N5*-diphenylbenzene-1,3,5-triamine (2):** Intermediate **1** (4.00 g, 9.93 mmol), 2,4,6-Trimethylaniline (3.36 g, 24.82 mmol), Pd(OAc)<sub>2</sub> (0.22 g, 0.99 mmol), *t*-Bu<sub>3</sub>P·HBF<sub>4</sub> (0.78 g, 2.58 mmol) and *t*-BuONa (2.56 g, 29.79 mmol) were dissolved in dry toluene (40 mL) at room temperature, after blowing argon for 15 minutes, the reaction was stirred at 110 °C for 18 h. After cooling to room temperature, toluene was removed by rotary evaporation. Subsequently, the resultant crude product underwent purification through the employment of silica gel column chromatography (eluent: petroleum ether/dichloromethane = 7:1, *v/v*), giving the intermediate **2** as a white solid (3.14 g, yield 62%). <sup>2</sup>:<sup>1</sup>H NMR (500 MHz, DMSO) δ = 7.19 (t, *J*=7.9, 1H), 6.90 (d, *J*=11.4, 2H), 6.79 (s, 1H), 5.45 (s, 0H), 5.39 (s, 0H), 2.16 (s, 1H), 2.05 (s, 3H).

**Synthesis of *N1,N3*-di(9,9'-spirobi[fluoren]-3-yl)-*N1,N3*-dimesityl-*N5,N5*-diphenylbenzene-1,3,5-triamine (3):** To a mixture of intermediate **2** (2.00 g, 3.90 mmol), 3-bromo-9,9'-spirobi[fluorene] (3.40 g, 8.59

mmol), Pd(OAc)<sub>2</sub> (0.08 g, 0.39 mmol), *t*-Bu<sub>3</sub>P·HBF<sub>4</sub> (0.29 g, 1.02 mmol) and *t*-BuONa (1.13 g, 11.72 mmol) in 30 mL dry toluene, was added under argon atmosphere, then the reaction was stirred at 110 °C for 12 h. After cooling to room temperature, toluene was removed by rotary evaporation. Subsequently, the resultant crude product underwent purification through the employment of silica gel column chromatography (eluent: petroleum ether/dichloromethane = 1:1, v/v), giving the intermediate **3** as a white solid (2.60 g, yield 58%). **3**: <sup>1</sup>H NMR (500 MHz, DMSO) δ = 7.97 (d, *J*=7.6, 1H), 7.87 (d, *J*=7.7, 0H), 7.60 (d, *J*=1.7, 1H), 7.42 – 7.31 (m, 2H), 7.16 – 7.08 (m, 3H), 7.01 (d, *J*=7.7, 1H), 6.85 (t, *J*=7.3, 1H), 6.81 (s, 1H), 6.55 – 6.48 (m, 2H), 6.36 (dt, *J*=21.5, 5.1, 1H), 6.07 (s, 0H), 6.03 (d, *J*=1.7, 0H), 2.08 (s, 2H), 1.95 (s, 3H). <sup>13</sup>C NMR (126 MHz, CDCl<sub>3</sub>) δ = 149.52, 149.15, 148.66, 147.61, 147.46, 145.95, 142.28, 141.72, 141.60, 140.35, 139.99, 137.09, 136.36, 129.68, 128.90, 127.71, 127.62, 127.50, 127.31, 124.08, 124.02, 123.80, 122.28, 120.02, 119.86, 111.16, 108.49, 106.14, 65.41, 20.87, 18.56.

**Synthesis of DB-SF1:** In an argon atmosphere, a solution of intermediate **3** (1.30 mmol) in 15 mL of highly dry 1,2-dichlorobenzene was prepared. BBr<sub>3</sub> (4.5 mL, 47.16 mmol) was then added to the solution at -78 °C. After stirring at room temperature for 1 hour, the reaction mixture was heated to 220 °C and stirred for 48 hours. Upon cooling the mixture to room temperature, *N,N*-diisopropylethylamine (10.39 mL, 62.88 mmol) was added at 0 °C to quench the excessive BBr<sub>3</sub> and generated hydrogen bromide, followed by gradual addition of methanol. Subsequently, the 1,2-dichlorobenzene was removed by rotary evaporation. The resulting crude product was subjected to purification using silica gel column chromatography (eluent: petroleum ether/dichloromethane = 12:1, v/v), yielding the desired products **DB-SF1** (0.60 g, 40% yield) as a yellow solid. **DB-SF1**: <sup>1</sup>H NMR (500 MHz, CDCl<sub>3</sub>) δ = 8.20 (s, 1H), 8.16 (d, *J*=8.2, 1H), 8.03 (d, *J*=9.0, 1H), 7.95 (d, *J*=8.4, 1H), 7.87 (d, *J*=8.1, 1H), 7.65 (d, *J*=8.2, 1H), 7.46 (t, *J*=8.0, 1H), 7.31 (dd, *J*=18.4, 9.5, 3H), 7.24 – 7.14 (m, 3H), 7.09 (t, *J*=7.5, 1H), 7.06 – 6.98 (m, 3H), 6.94 (d, *J*=8.0, 1H), 6.70 (dd, *J*=22.5, 8.1, 2H), 5.30 (s, 0H), 2.52 (s, 3H), 1.76 (d, *J*=16.8, 6H). <sup>13</sup>C NMR (126 MHz, toluene-*d*<sub>8</sub>) δ = 150.84, 149.86, 149.63, 148.57, 147.36, 146.71, 146.58, 145.66, 141.92, 141.84, 141.69, 141.11, 137.80, 137.30, 137.11, 136.84, 134.09, 130.52, 130.04, 129.52, 128.81, 128.69, 128.50, 128.31, 127.93, 127.88, 127.78, 127.59, 127.52, 127.40, 125.04, 124.95, 124.76, 124.56, 124.40, 124.32, 124.18, 123.66, 123.20, 120.37, 120.05, 119.99, 106.19, 89.75, 65.98, 21.08, 20.51, 20.36, 20.20, 20.05, 19.90, 19.75, 19.59, 17.13, 16.89.

**Synthesis of *N1,N3-di(9,9'-spirobifluoren)-2-yl)-N1,N3-dimesityl-N5,N5-diphenylbenzene-1,3,5-triamine (4)*:** To a mixture of intermediate **2** (2.00 g, 3.90 mmol), 2-bromo-9,9'-spirobifluorene (3.40 g, 8.59 mmol), Pd(OAc)<sub>2</sub> (0.08 g, 0.39 mmol), *t*-Bu<sub>3</sub>P·HBF<sub>4</sub> (0.29 g, 1.02 mmol) and *t*-BuONa (1.13 g, 11.72 mmol) in 30 mL dry toluene was added under argon atmosphere, then the reaction was stirred at 110 °C for 12 h. After cooling to room temperature, toluene was removed by rotary evaporation. Subsequently, the resultant crude product underwent purification through the employment of silica gel column chromatography (eluent: petroleum ether/dichloromethane = 3:1, *v/v*), giving the intermediate **4** as a white solid (0.99 g, yield 90%). **4**: <sup>1</sup>H NMR (500 MHz, DMSO) δ = 7.92 (d, *J*=7.6, 1H), 7.81 (d, *J*=7.6, 1H), 7.75 (d, *J*=8.4, 1H), 7.35 – 7.26 (m, 2H), 7.05 (t, *J*=7.8, 1H), 7.01 – 6.94 (m, 2H), 6.86 (t, *J*=7.4, 1H), 6.69 (s, 1H), 6.62 (d, *J*=7.8, 1H), 6.48 (t, *J*=5.9, 1H), 6.40 (d, *J*=7.6, 0H), 6.18 (d, *J*=1.8, 0H), 6.04 (s, 0H), 5.54 (d, *J*=1.7, 0H), 2.14 (s, 2H), 1.49 (s, 3H). <sup>13</sup>C NMR (126 MHz, CDCl<sub>3</sub>) δ = 149.30, 149.13, 148.72, 148.19, 146.86, 146.75, 145.70, 141.66, 141.50, 140.04, 136.74, 135.98, 134.27, 129.41, 128.59, 127.87, 127.47, 126.28, 123.79, 123.55, 123.53, 121.97, 120.42, 119.76, 118.94, 118.78, 114.27, 109.57, 106.39, 65.85, 20.89, 18.17.

**Synthesis of *DB-SF2*:** In an argon atmosphere, a solution of intermediate **4** (1.30 mmol) in 15 mL of highly dry 1,2-dichlorobenzene was prepared. BBr<sub>3</sub> (4.5 mL, 47.16 mmol) was then added to the solution at -78 °C. After stirring at room temperature for 1 hour, the reaction mixture was heated to 220 °C and stirred for 48 hours. Upon cooling the mixture to room temperature, *N,N*-diisopropylethylamine (10.39 mL, 62.88 mmol) was added at 0 °C to quench the excessive BBr<sub>3</sub> and generated hydrogen bromide, followed by gradual addition of methanol. Subsequently, the 1,2-dichlorobenzene was removed by rotary evaporation. The resulting crude product was subjected to purification using silica gel column chromatography (eluent: petroleum ether/dichloromethane = 12:1, *v/v*), yielding the desired products **DB-SF2** (0.60 g, 40% yield) as a yellow solid. **DB-SF2**: <sup>1</sup>H NMR (400 MHz, CDCl<sub>3</sub>) δ = 9.31 (s, 1H), 8.99 (d, *J*=7.8, 1H), 8.38 (d, *J*=7.9, 1H), 8.05 (d, *J*=7.6, 1H), 7.71 (dd, *J*=7.5, 3.8, 2H), 7.60 (dd, *J*=12.1, 3.8, 2H), 7.39 (t, *J*=7.4, 1H), 7.30 (d, *J*=3.0, 1H), 7.09 – 6.97 (m, 3H), 6.80 (d, *J*=7.5, 1H), 6.64 (dd, *J*=9.7, 8.0, 2H), 6.57 (s, 1H), 6.48 (s, 1H), 6.09 (s, 1H), 4.95 (s, 0H), 2.18 (s, 3H), 1.41 (s, 3H), 1.24 (s, 3H). Due to the poor solubility of this compound, we did not obtain its carbon spectrum.

### 1.3. Single Crystal X-ray Crystallography

The single crystal of **DB-SF1** and **DB-SF2** was prepared from a methanol/chlorobenzene solution by evaporation method. X-ray single crystal data was collected on a Bruker D8 Venture diffractometer using CuK $\alpha$  radiation ( $\lambda = 1.54178$ ) source. The selected crystal was kept at 158.0 K during data collection. Using Olex2<sup>1</sup>, the structure was solved with the ShelXT<sup>2</sup> structure solution program using Intrinsic Phasing and refined with the ShelXL<sup>3</sup> refinement package using Least Squares minimization. Selected crystal data are listed in **Table S1-S2**. All crystallographic information in CIF format have been deposited at the Cambridge Crystallographic Data Center (CCDC) under deposition number 2369010 and 2369013 for **DB-SF1** and **DB-SF2** via [www.ccdc.cam.ac.uk/data\\_request/cif](http://www.ccdc.cam.ac.uk/data_request/cif), or by emailing [data\\_request@ccdc.cam.ac.uk](mailto:data_request@ccdc.cam.ac.uk), or by contacting the Cambridge Crystallographic Data Center, 12 Union Road, Cambridge CB2 1EZ, UK; fax: +44 1223 336033.

### 1.4. Quantum Chemical Calculations

All of the calculations were carried out with Gaussian 16 program package. Density functional theory (DFT) calculations on the geometrical and electronic properties of the ground-state were performed based on B3LYP density functional method with basis set 6-31G(d,p). The density functional dispersion correction was conducted by Grimme's D3 version with Becke-Johnson damping function. Time-dependent DFT (TD-DFT) calculations were also carried out by this method. Vertical excitation calculations were based on optimized S<sub>0</sub> geometries, and geometry optimizations for excited S<sub>1</sub> and T<sub>1</sub> states were carried out at the same level of theory. The analysis of hole and electron pair distributions was conducted using the Multiwfn code.<sup>4,5</sup> Spin-Component Scaling second-order approximate Coupled-Cluster (SCS-CC2) calculations were performed using the MRCC program with the cc-pVDZ basis-set.<sup>6,7</sup>

The spin-orbit coupling (SOC) matrix elements between the S<sub>1</sub> and T<sub>1</sub> states for the emitters were calculated with PySOC using the T<sub>1</sub> geometries, by considering that the three T<sub>1</sub><sup>m</sup> substrates (m = 1, 0, -1) are

degenerate, *i.e.*  $\langle S_1 | \hat{H}_{soc} | T_1 \rangle = \sqrt{\sum_{m=0,\pm 1} \langle S_1 | \hat{H}_{so} | T_1^m \rangle^2}$ , where the  $\hat{H}_{soc}$  represents the interaction of the SOC.<sup>8</sup>

All SOC values were obtained at the TD-DFT level of theory using the B3LYP functional and the 6-31G(d,p) basis set.

The Huang-Rhys factors (HRF) and reorganization energy for S<sub>1</sub>→S<sub>0</sub> and S<sub>0</sub>→S<sub>1</sub> transition were conducted with the DUSHIN module in MOMAP (Molecular Materials Property Prediction Package).

## 1.5. Thermal and Electrochemical Characterization

Thermogravimetric analysis (TGA) was undertaken using TGA-Q50 Instrument (TA Instruments, America) at a heating rate of 10 °C/min from 50 °C to 800 °C under nitrogen flushing. The thermal decomposition temperatures ( $T_d$ ) were determined by the recorded temperature at 5% weight loss. Cyclic voltammetry (CV) measurements were carried out on a CHI600 electrochemical analyzer (Chenhua, China) at room temperature and a scan speed of 50 mV s<sup>-1</sup>, with a conventional three-electrode system consisting of a glassy carbon working electrode, a platinum wire auxiliary electrode, and an Ag/AgCl standard electrode using as the reference electrode. The supporting electrolyte was 0.1 M tetrabutylammonium hexafluorophosphate (Bu<sub>4</sub>NPF<sub>6</sub>) in anhydrous dichloromethane solution, and ferrocene was added as a calibrant in the whole measurement. The HOMO energy levels of the compounds were calculated according to the formula:  $E_{\text{HOMO}}$  (eV) = - [4.8 + ( $E_{1/2(\text{ox/red})}$  -  $E_{1/2(\text{Fc}^+/ \text{Fc})}$ )] eV. The LUMO energy levels of the compounds were then deduced from the HOMO levels and the UV-Vis absorption onsets of the longer wavelength.

## 1.6. Photophysical Characterization

The UV-vis absorption spectra were obtained on a Shimadzu UV-2600 spectrophotometer (Shimadzu, Japan) at room temperature with a concentration of 1×10<sup>-5</sup>M. Phosphorescence spectra were measured on a Hitachi F-7100 fluorescence spectrophotometer at 77 K. The transient photoluminescence (PL) decay curves were obtained by FluoTime 300 (PicoQuant GmbH) with a Picosecond Pulsed UV-LASTER (LASTER375) as the excitation source. The solid-state PL quantum efficiencies ( $\Phi_{\text{PLS}}$ ) were measured on a Hamamatsu UV-NIR absolute PL quantum yield spectrometer (C13534, Hamamatsu Photonics) equipped with an integrating sphere. The integrating sphere was purged with dry argon to maintain an inert atmosphere and all the samples were excited at 320 nm. Nanosecond time-resolved transient absorption spectra and decay kinetics were measured on LFP instrument (LP 980, Edinburgh Instruments LTD). The pump laser beam and the probe beam crossed perpendicularly through the liquid sample in a quartz cuvette (10 mm × 10 mm). A dynamic decay curve was recorded with a digital phosphor oscilloscope (TDS 3012C, Tektronix Inc.).

## 1.7. Analysis of Rate Constants

The estimation of rate constants pertaining to radiative decay ( $k_r$ ) and nonradiative decay ( $k_{nr}$ ) transitioning from S<sub>1</sub> to S<sub>0</sub>, as well as the rate constants associated with intersystem crossing ( $k_{\text{ISC}}$ ) and reverse intersystem crossing ( $k_{\text{RISC}}$ ), can be accomplished by employing the subsequent equations.<sup>9-11</sup>

$$k_r = \Phi_p k_p + \Phi_d k_d \approx \Phi_p k_p \dots \text{Eq.(1)}$$

$$k_{nr} = \frac{1 - \Phi_{PL}}{\Phi_{PL}} k_r \dots \text{Eq.(2)}$$

$$k_{ISC} = k_p - k_r - k_{nr} \dots \text{Eq.(3)}$$

$$k_{RISC} = (k_p k_d \Phi_d) / (k_{ISC} \Phi_p) \dots \text{Eq.(4)}$$

Where  $k_p$  and  $k_d$  represent the decay rate constants for prompt and delayed fluorescence, respectively, which are in reciprocal relationship with the decay time constants ( $\tau_p$  and  $\tau_d$ ) experimentally determined from transient PL characteristics.  $\Phi_p$  and  $\Phi_d$  indicate prompt and delayed fluorescence components and can be distinguished from the total  $\Phi_{PL}$  by comparing the integrated intensities of prompt ( $r_p$ ) and delayed components ( $r_d$ ) in the transient PL spectra.  $r_p$  and  $r_d$  were determined using  $\tau_p$  and  $\tau_d$  and fitting parameter ( $A_p, A_d$ ) as follows.

$$I(t) = A_p e^{-\frac{t}{\tau_p}} + A_d e^{-\frac{t}{\tau_d}} \dots \text{Eq.(5)}$$

$$r_p = A_p \tau_p / (A_p \tau_p + A_d \tau_d) \dots \text{Eq.(6)}$$

$$r_d = A_d \tau_d / (A_p \tau_p + A_d \tau_d) \dots \text{Eq.(7)}$$

## 1.8. Device Fabrication and Measurement

The ITO coated glass substrates with a sheet resistance of  $15 \Omega \text{ square}^{-1}$  were consecutively ultrasonicated with acetone/ethanol and dried with nitrogen gas flow, followed by 20 min ultraviolet light-ozone (UVO) treatment in a UV-ozone surface processor (PL16 series, Sen Lights Corporation). Then the sample was transferred to the deposition system. Both 8-hydroxyquinolinolato-lithium (Liq) as electron injection layer and aluminum (Al) as cathode layer were deposited by thermal evaporation at  $5 \times 10^{-5} \text{ Pa}$ . The organic layers were deposited at the rates of 0.2-3  $\text{\AA}/\text{s}$ . After the organic film deposition, Liq and Al layer were deposited with rates of 0.1 and 3  $\text{\AA}/\text{s}$ , respectively. The emitting area of the device is about  $0.09 \text{ cm}^2$ . The current density-voltage-luminance ( $J$ - $V$ - $L$ ), EQE- $L$  curves and electroluminescence spectra were measured using a Keithley 2400 source meter and an absolute EQE measurement system (C9920-12, Hamamatsu Photonics, Japan). The device operational lifetime ( $LT_{50}$ ) was evaluated by measuring the luminance over time at constant current densities (FS-MP64, Suzhou FSTAR Scientific Instrument Co. Ltd., China).





## 2. Schemes, Figures and Tables

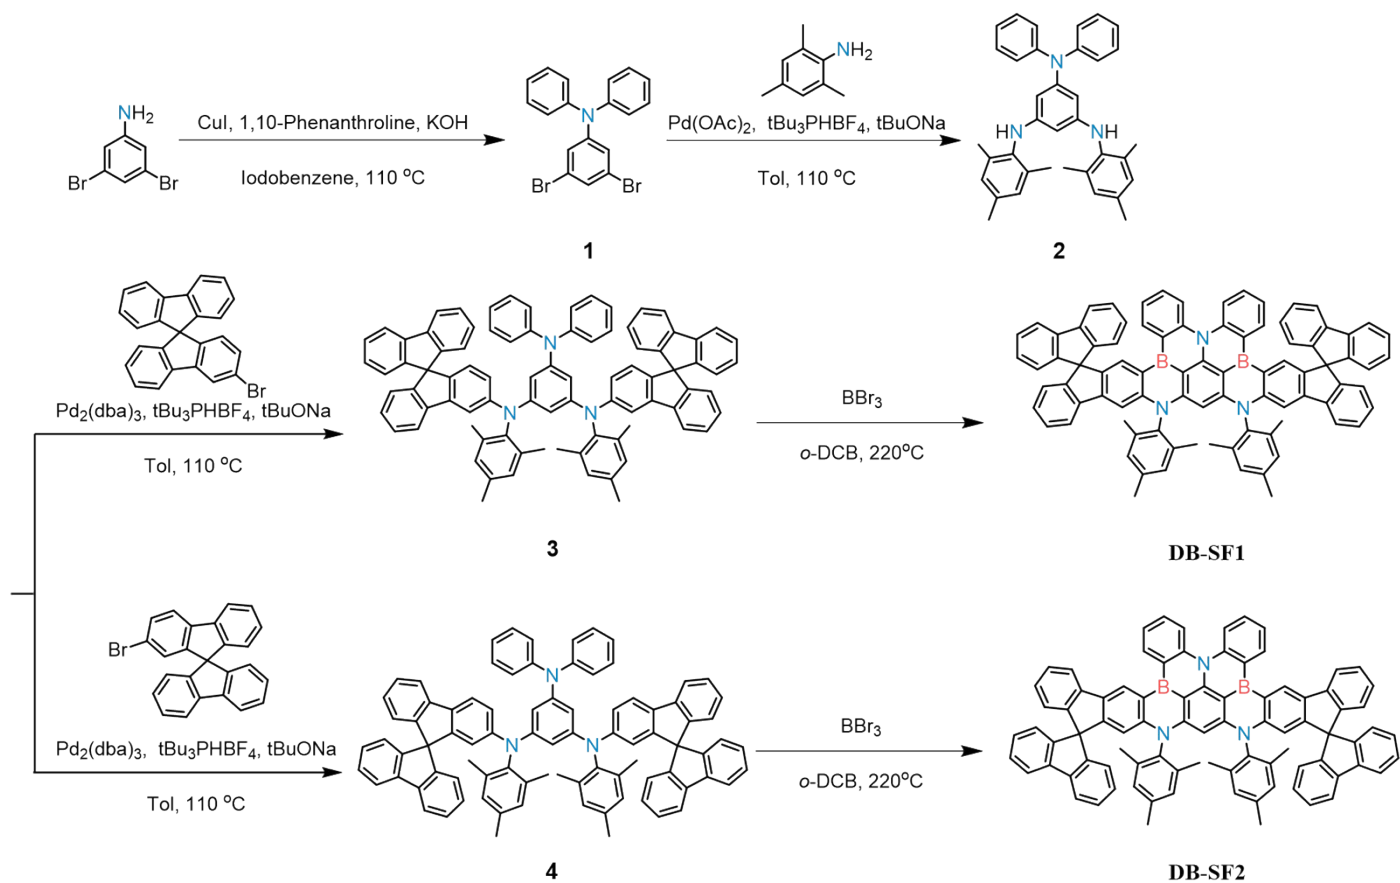

**Scheme S1.** Synthetic route of **DB-SF1** and **DB-SF2**.

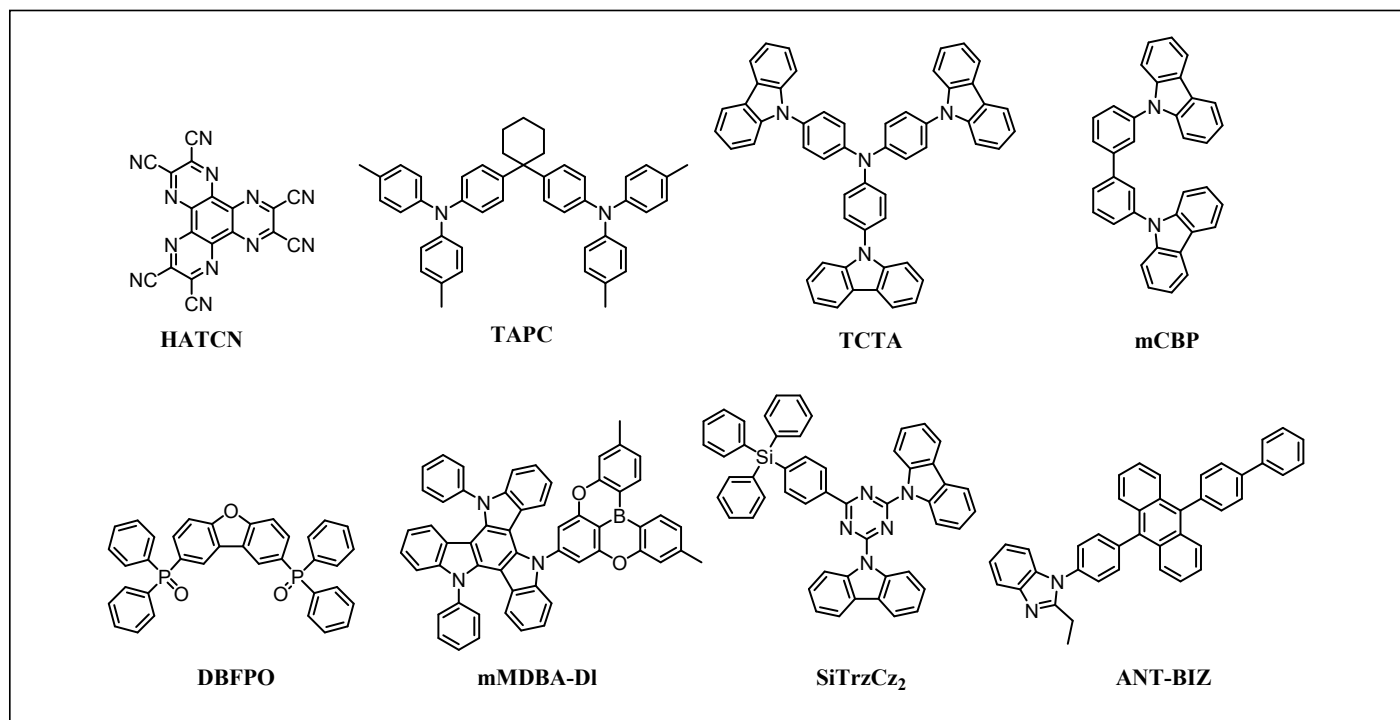

**Scheme S2.** Chemical structures of materials utilized for device fabrication.

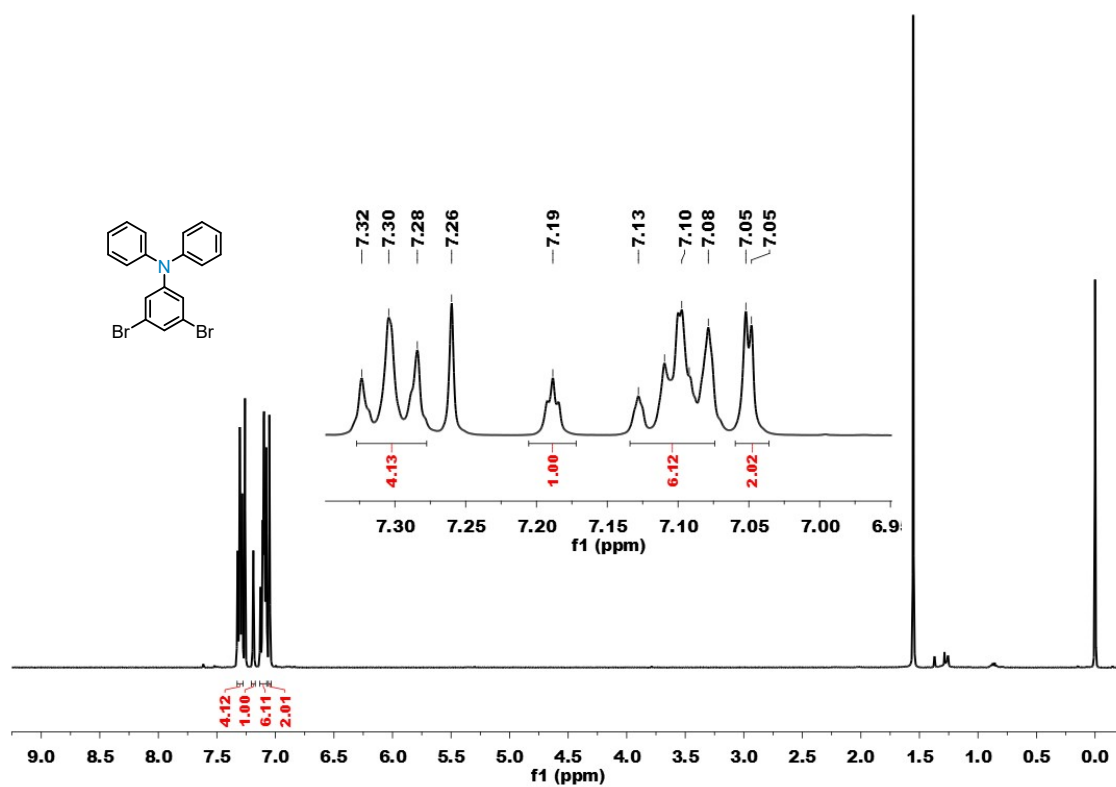

**Figure S1.** <sup>1</sup>H NMR spectrum of **1** in CDCl<sub>3</sub> (400 MHz, 25 °C).

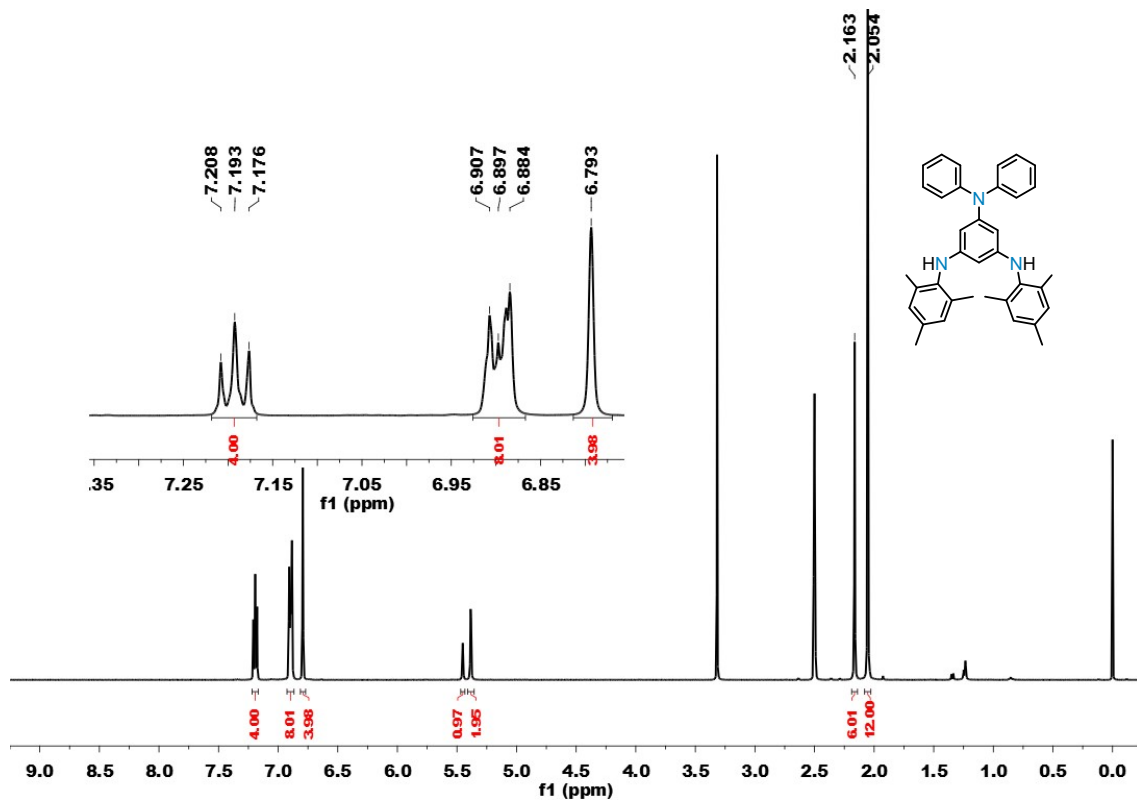

**Figure S2.**  $^1\text{H}$  NMR spectrum of **2** in  $\text{DMSO-}d_6$  (500 MHz, 25  $^\circ\text{C}$ ).

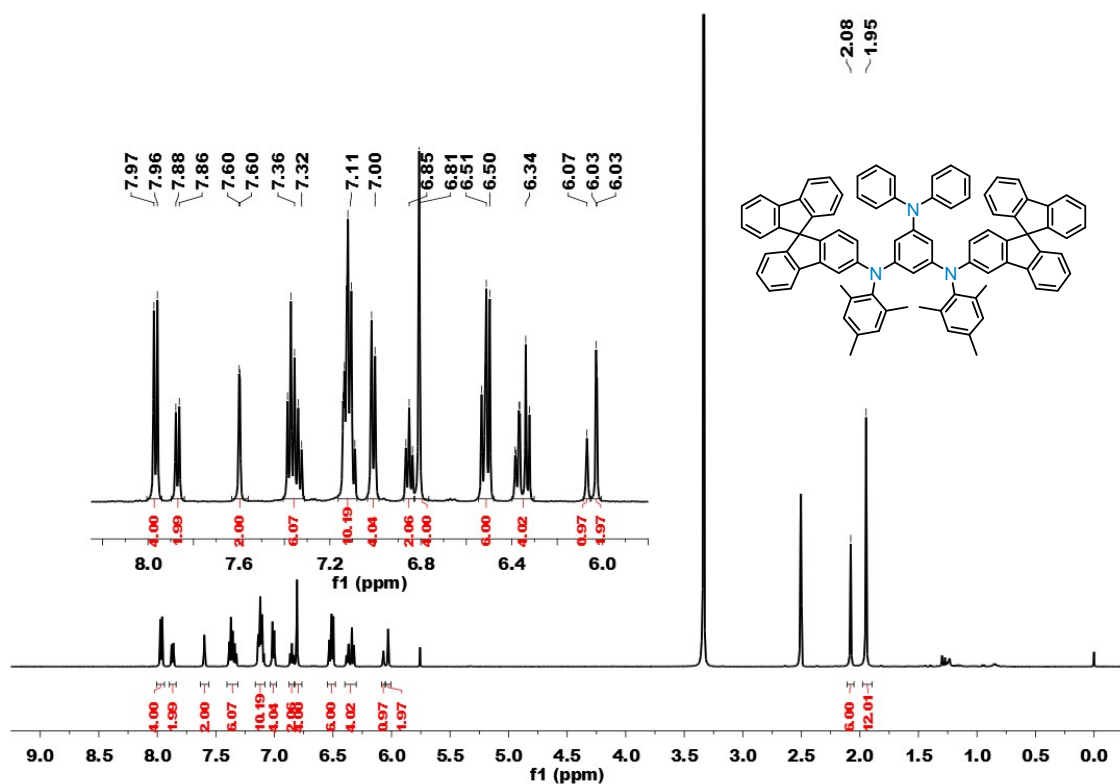

**Figure S3.**  $^1\text{H}$  NMR spectrum of **3** in  $\text{DMSO-}d_6$  (500 MHz, 25  $^\circ\text{C}$ ).

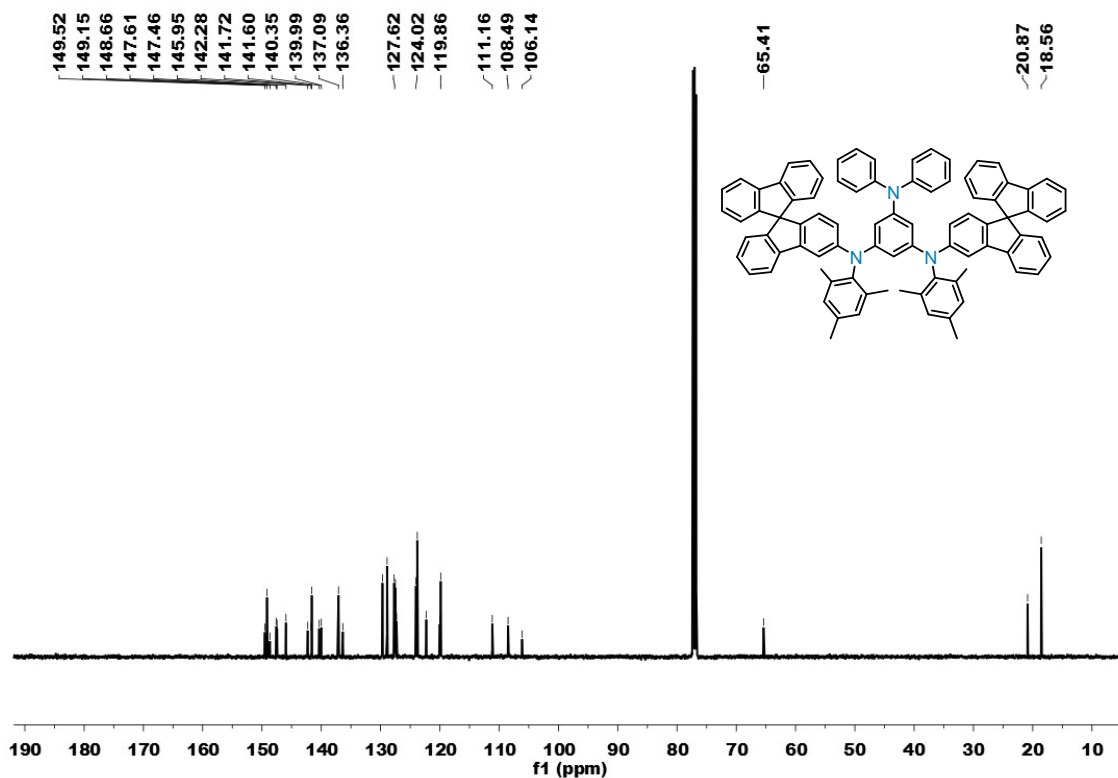

Figure S4. <sup>13</sup>C NMR spectrum of **3** in CDCl<sub>3</sub> (126 MHz, 25 °C).

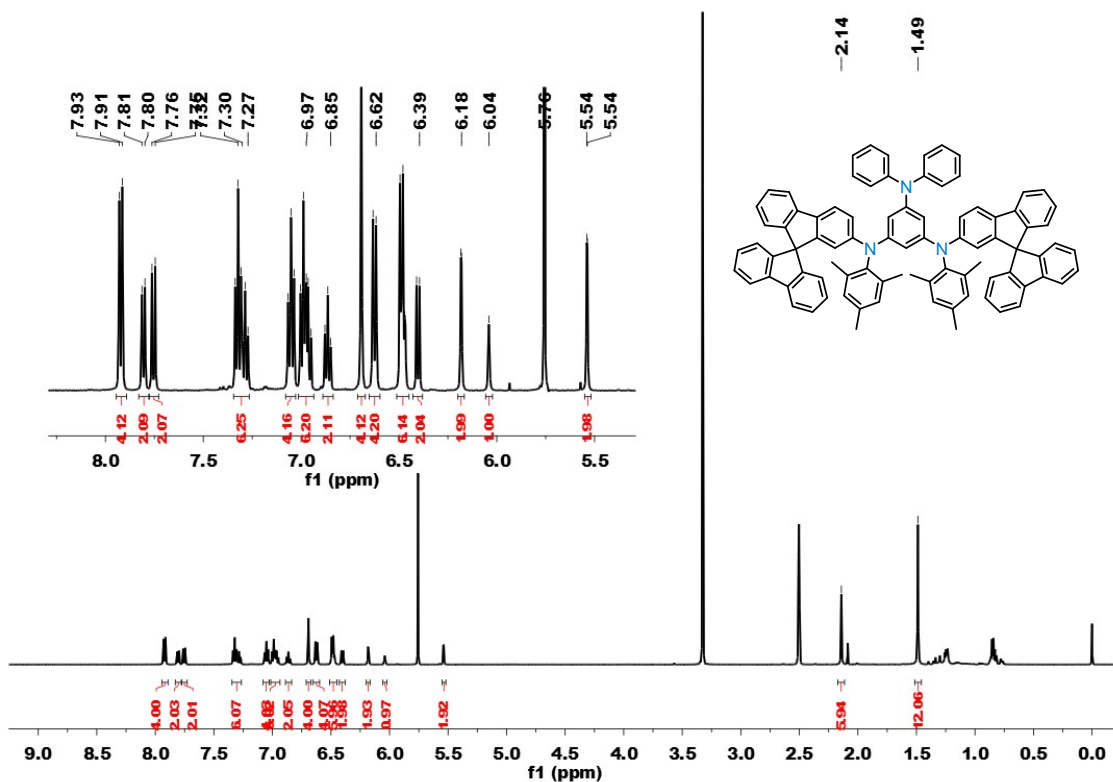

**Figure S5.**  $^1\text{H}$  NMR spectrum of **4** in  $\text{DMSO-}d_6$  (500 MHz, 25 °C).

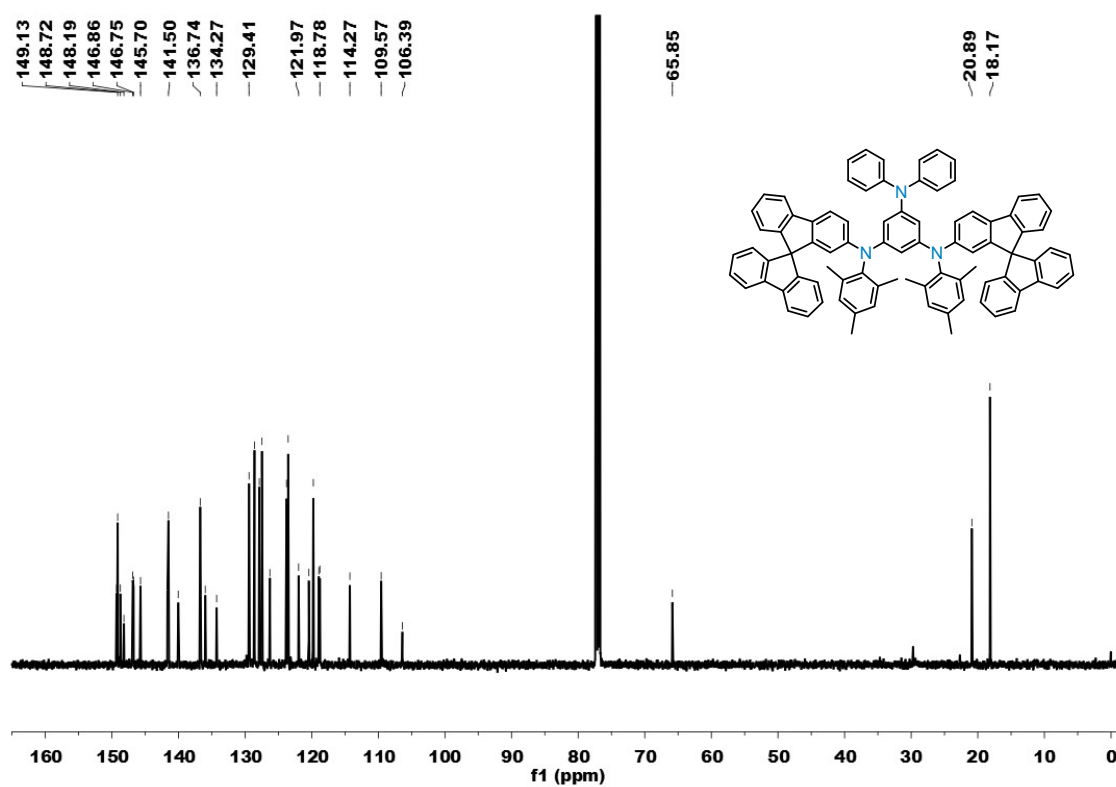

**Figure S6.**  $^{13}\text{C}$  NMR spectrum of **4** in  $\text{CDCl}_3$  (126 MHz, 25 °C).

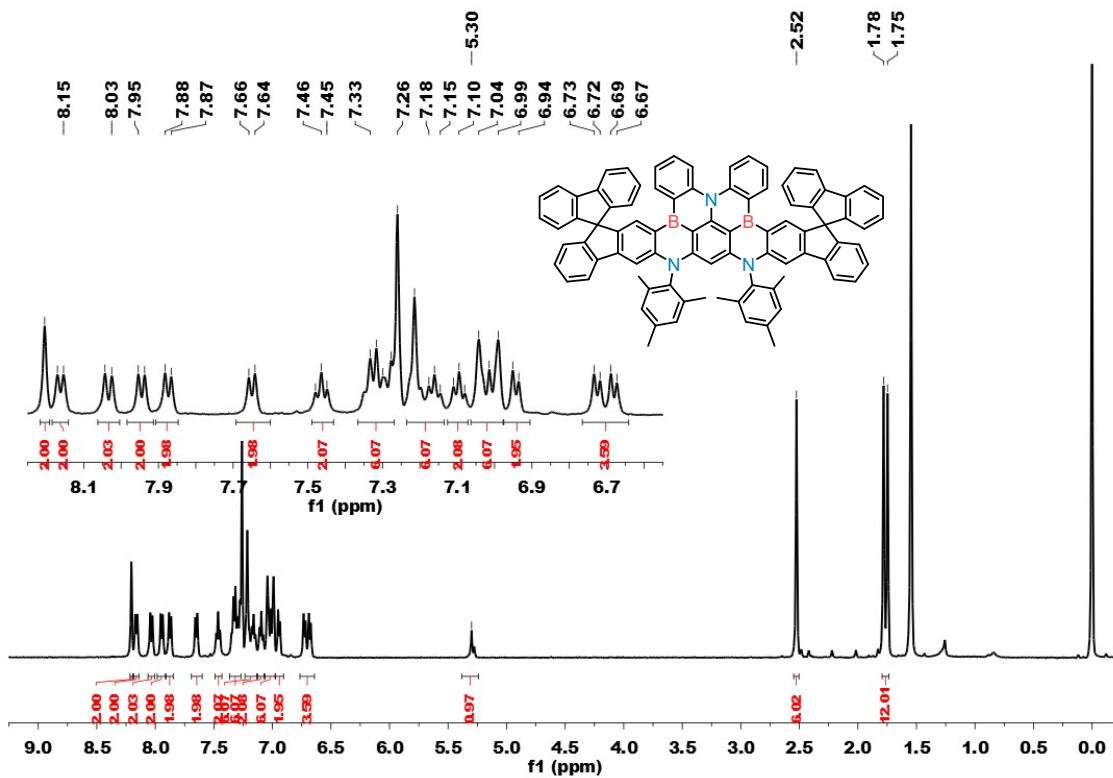

**Figure S7.** <sup>1</sup>H NMR spectrum of DB-SF1 in CDCl<sub>3</sub> (500 MHz, 25 °C).

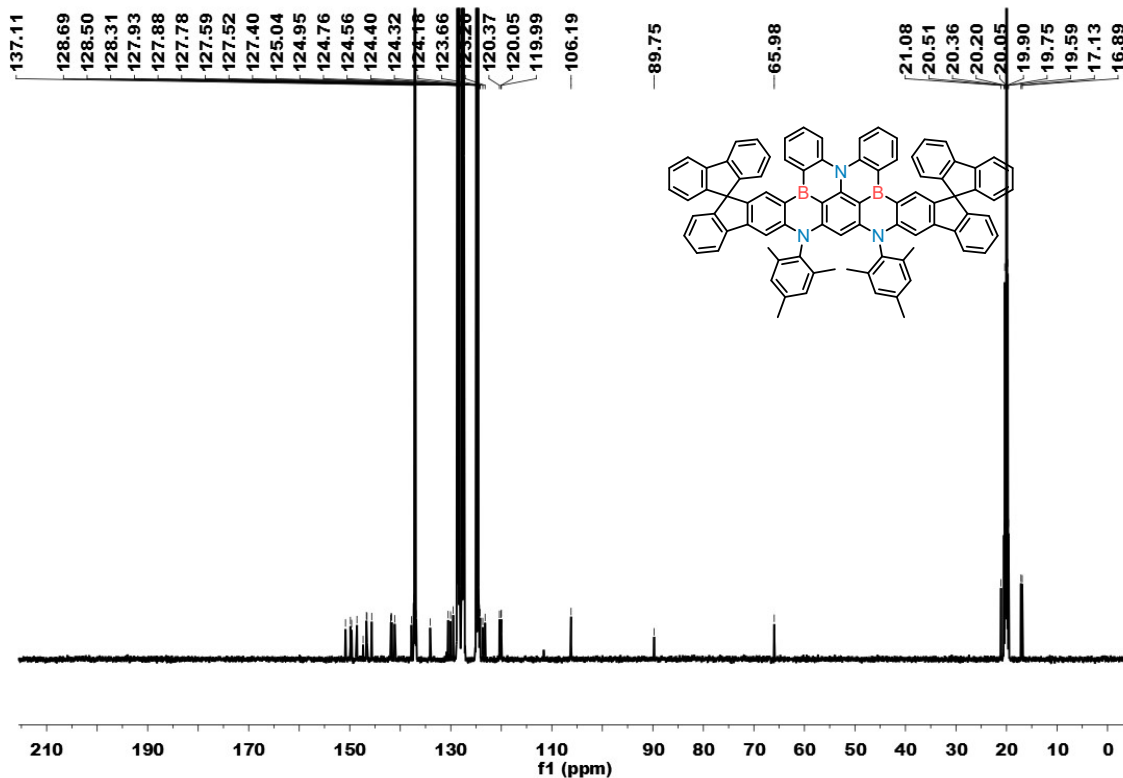

**Figure S8.**  $^{13}\text{C}$  NMR spectrum of **DB-SF1** in toluene- $d_8$  (500 MHz, 25 °C).

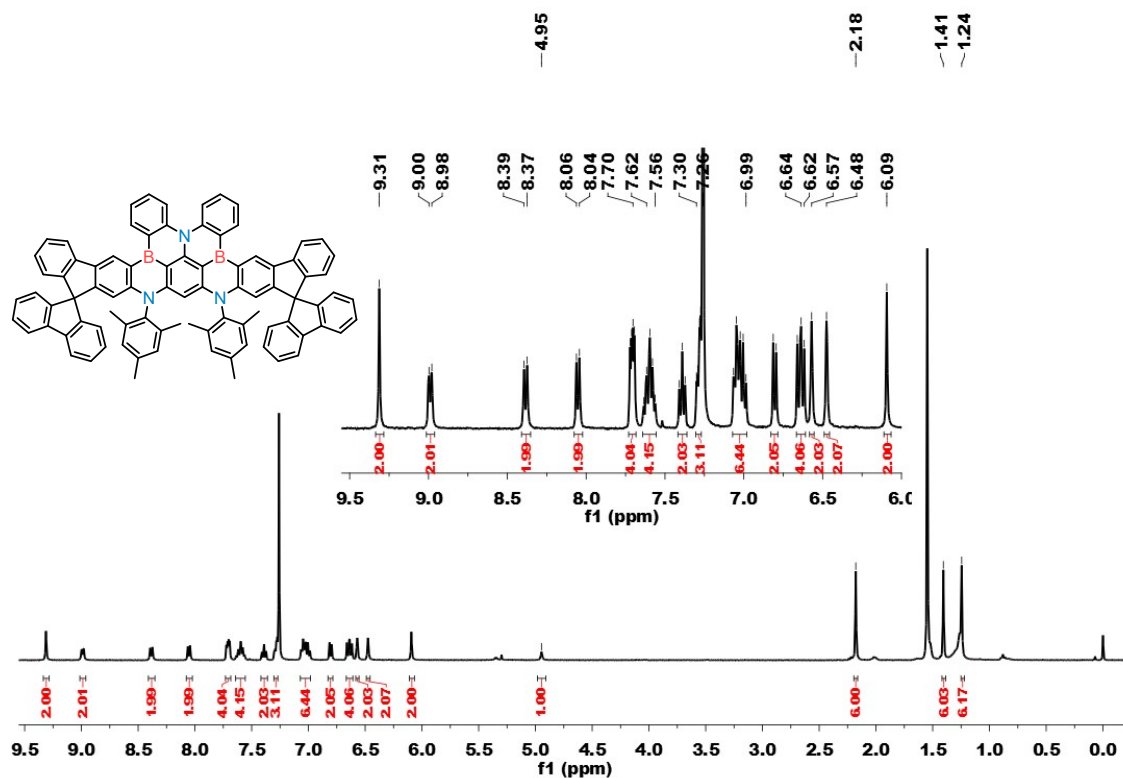

**Figure S9.**  $^1\text{H}$  NMR spectrum of **DB-SF2** in  $\text{CDCl}_3$  (500 MHz, 25 °C).

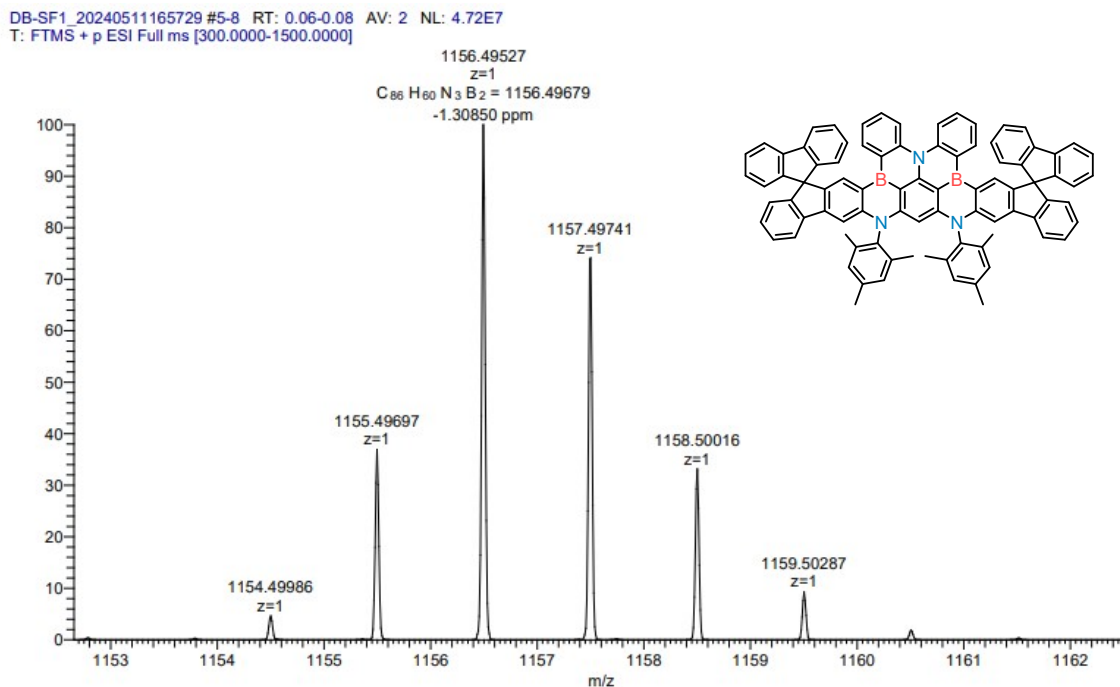

**Figure S10.** HR-MS spectrum of **DB-SF1**.

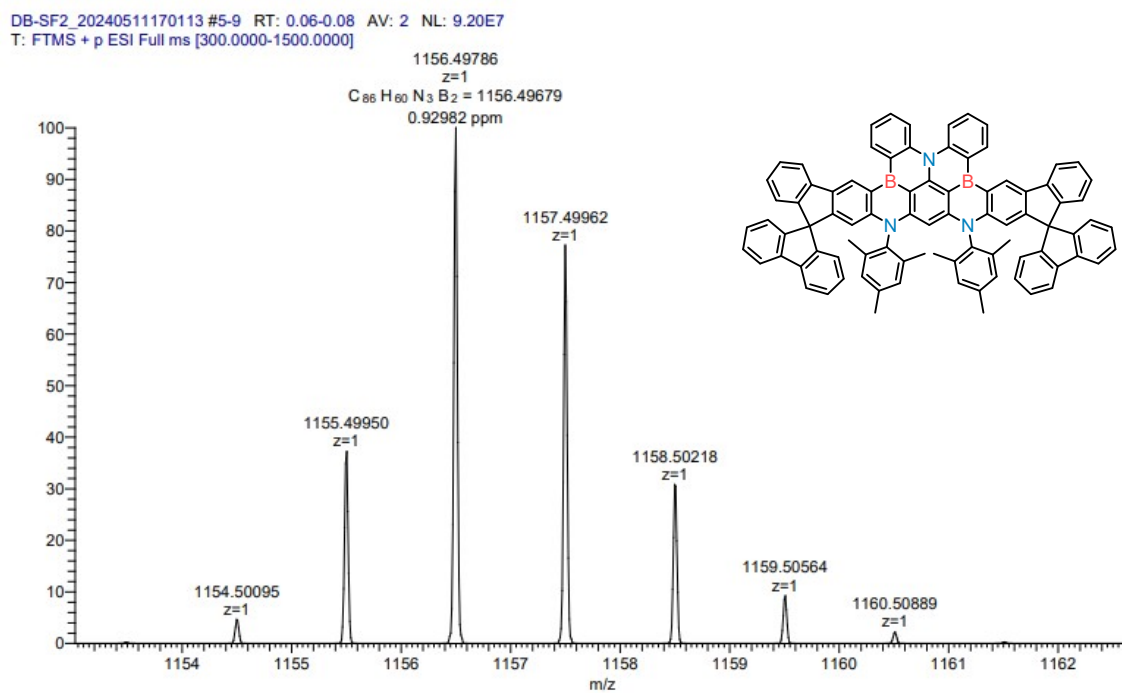

**Figure S11.** HR-MS spectrum of **DB-SF2**.

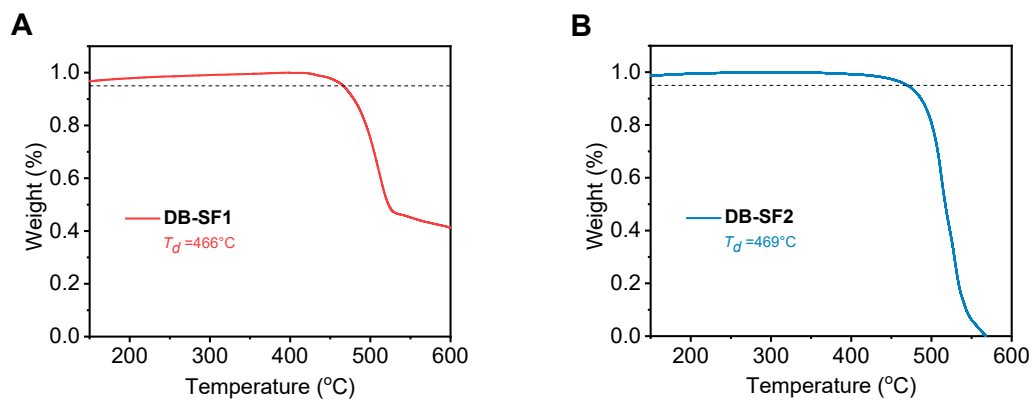

**Figure S12.** Thermal gravimetric analysis (TGA) curves at a heating rate of  $10^\circ\text{C min}^{-1}$ .



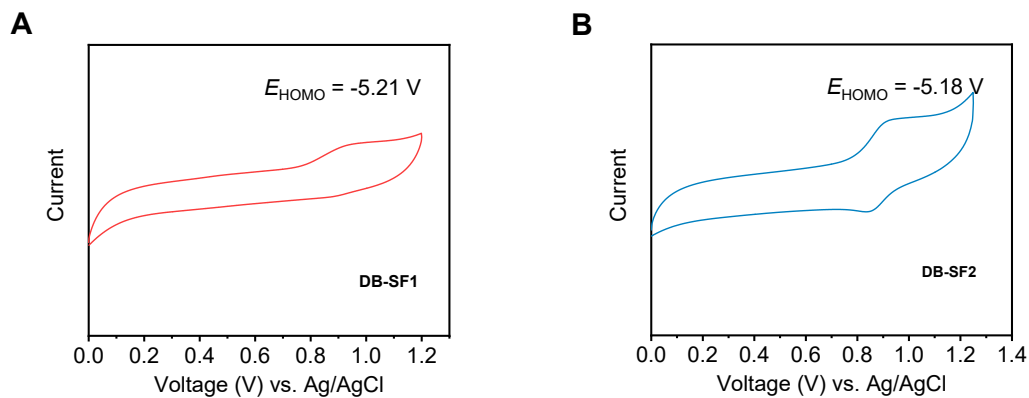

**Figure S13.** The oxidation curves obtained from the cyclic voltammetry (CV) measurement for the emitters.

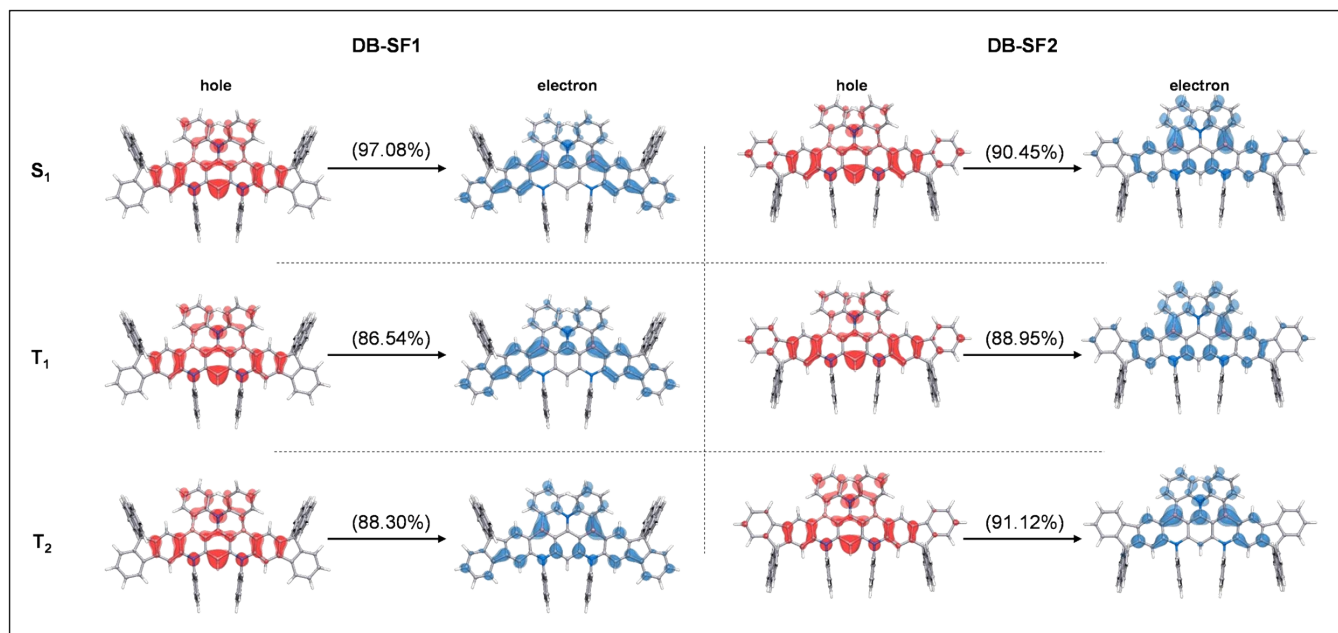

**Figure S14.** Natural transition orbital (NTO) distributions of the emitters with an iso-value of 0.025.

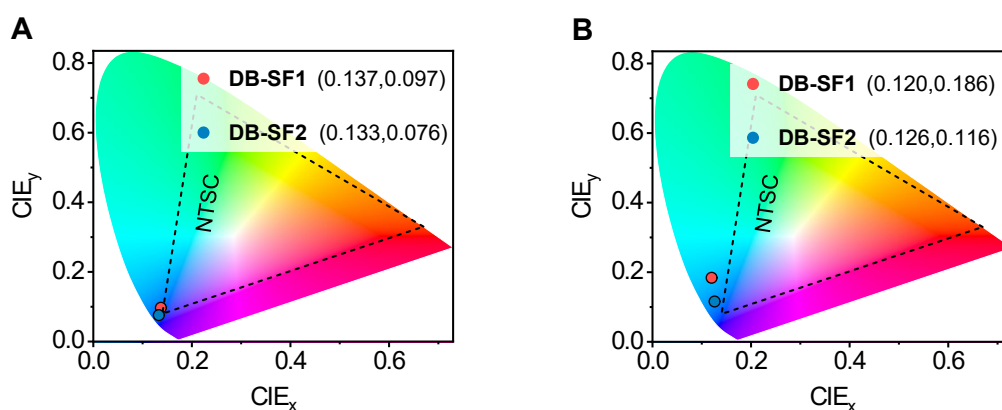

**Figure S15.** CIE color coordinates of the emitters in (A)  $1 \times 10^{-5}$  M toluene and (B) PMMA thin film (2 wt%).

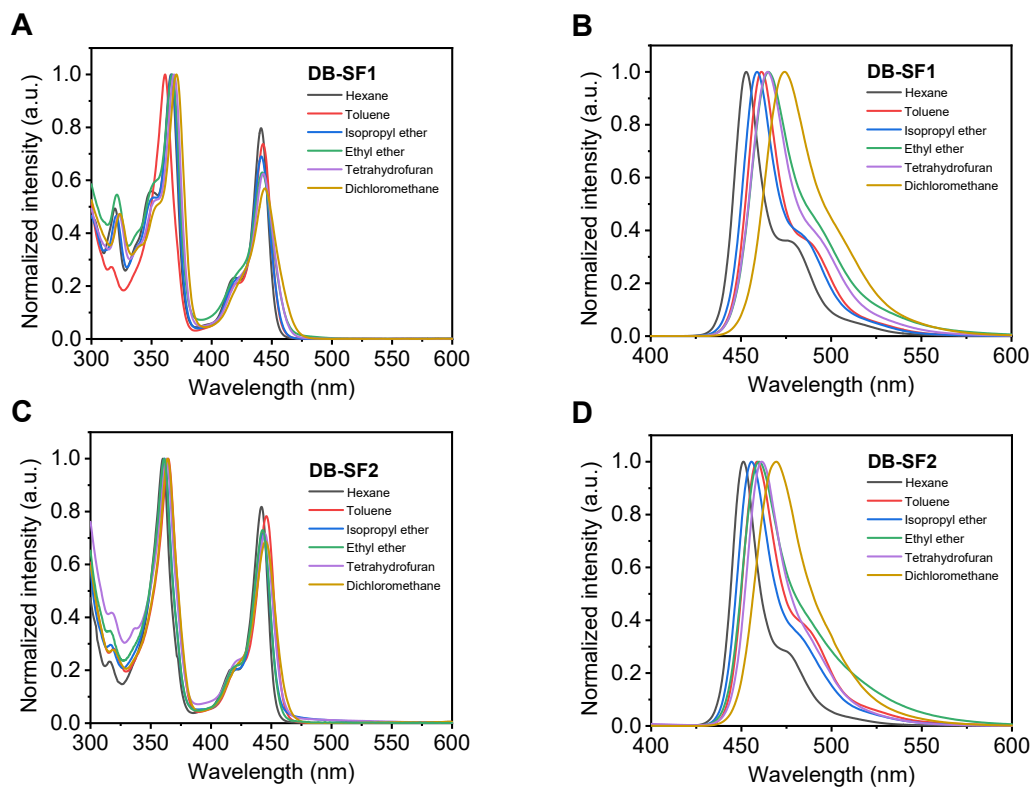

**Figure S16.** (A, C) Absorption and (B, D) photoluminescence (PL) spectra of **DB-SF1** and **DB-SF2** in different solvents at fixed concentration of  $1 \times 10^{-5}$  M.

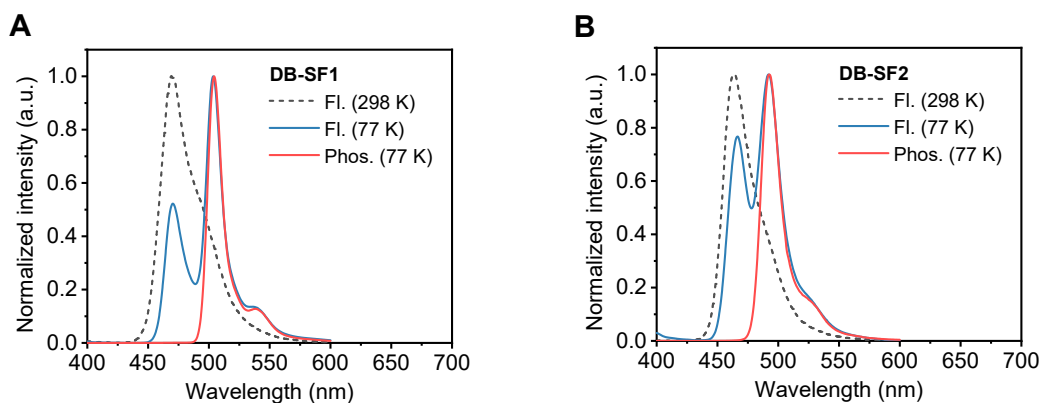

**Figure S17.** Normalized fluorescence (Fl.) at 298 K and 77 K, as well as phosphorescence spectra (Phos.) recorded at 77 K of the emitters in 2 wt% polymethyl methacrylate (PMMA) doped films. At 298 K, the fluorescence maxima and FWHM for **DB-SF1** and **DB-SF2** were observed at 469/35 nm and 464/31 nm, respectively. The  $S_1$  and  $T_1$  energy levels were determined from the peak maxima of fluorescence and phosphorescence at 77 K, yielding values of 2.64/2.46 eV for **DB-SF1** and 2.66/2.52 eV for **DB-SF2**,

corresponding to  $\Delta E_{ST}$  of 0.18 eV and 0.14 eV, respectively.

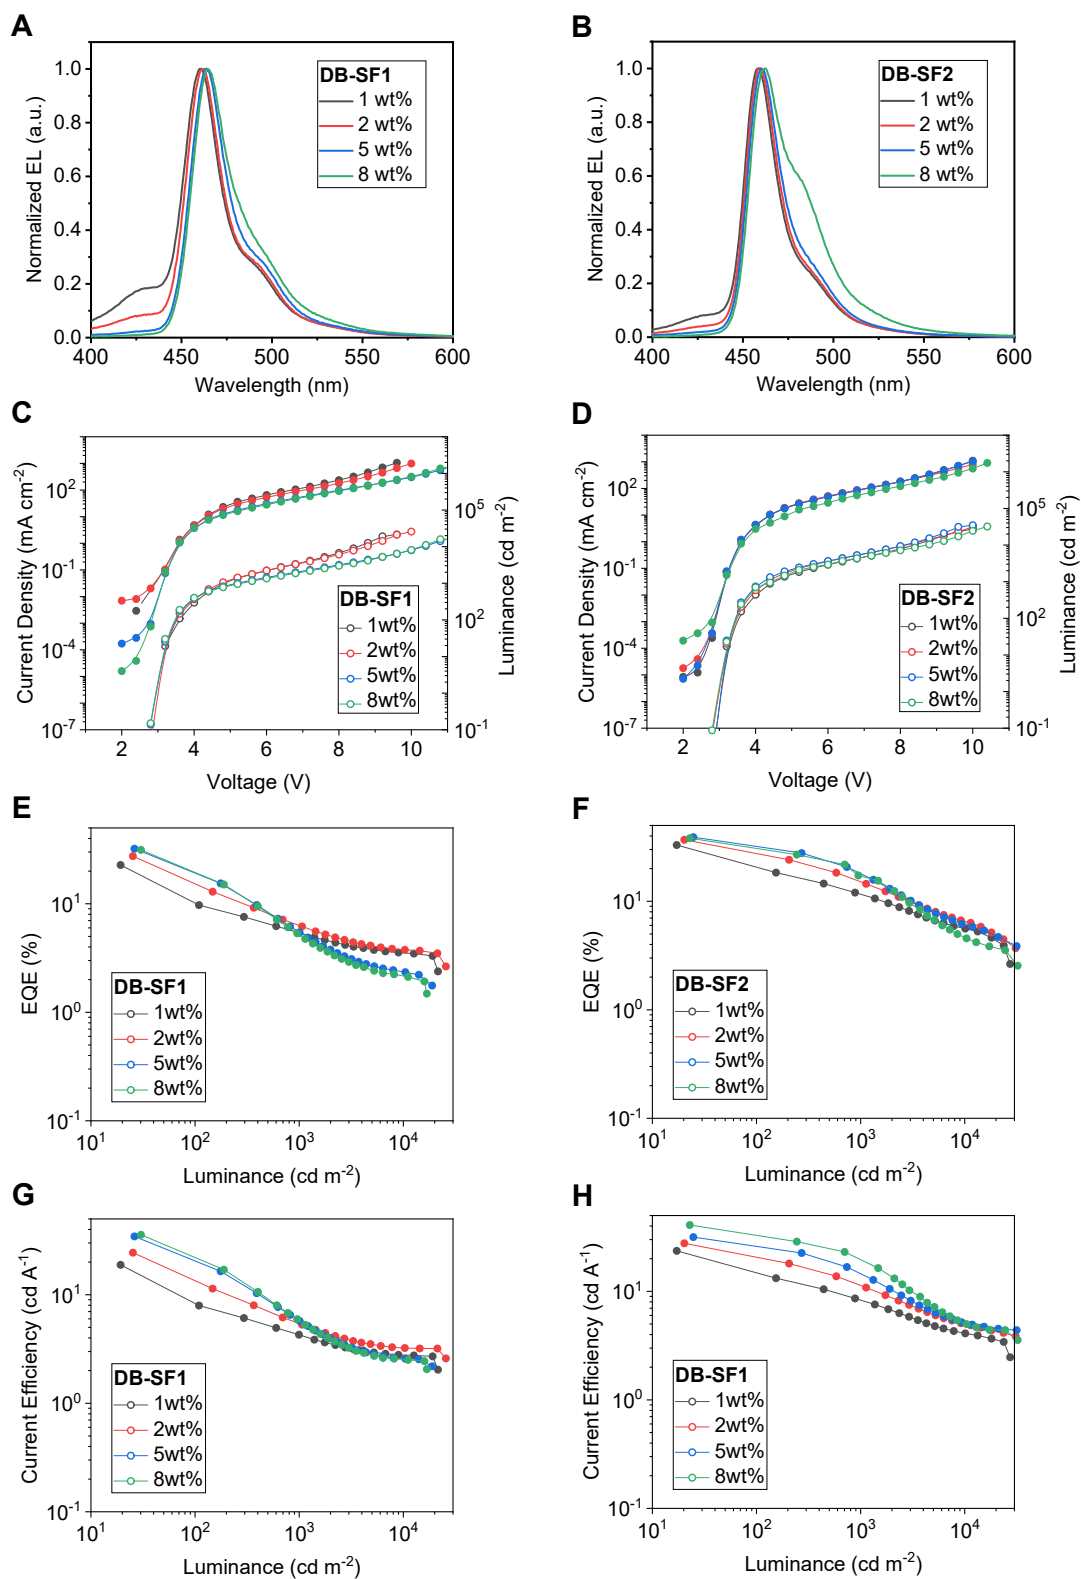

**Figure S18.** (A, B) EL spectra, (C, D) current density and luminance vs voltage ( $J$ - $V$ - $L$ ) curves, (E, F) external quantum efficiency vs luminance (EQE- $L$ ) characteristics, (G, H) current efficiency vs luminance (CE- $L$ ) characteristics of the non-sensitized devices based on **DB-SF1** and **DB-SF2** at different doping ratios.

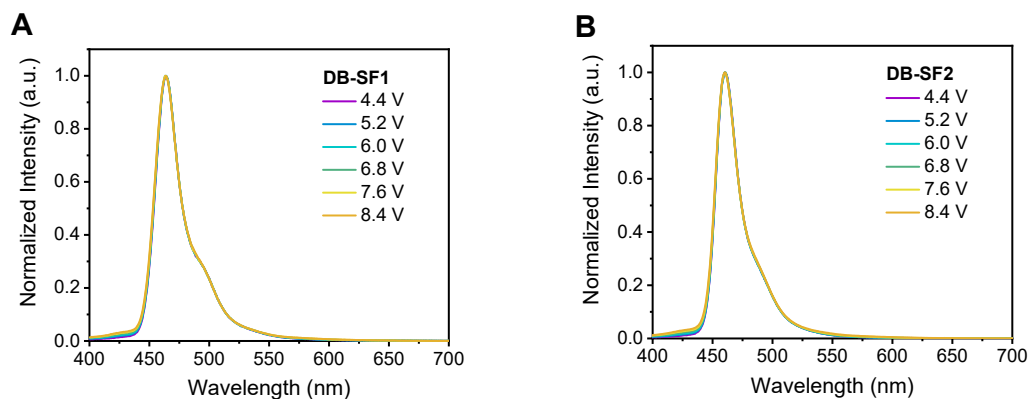

**Figure S19.** Electroluminescence (EL) of the non-sensitized devices with 5 wt% doping ratio based on (A) **DB-SF1**, (B) **DB-SF2** at different driving voltages.

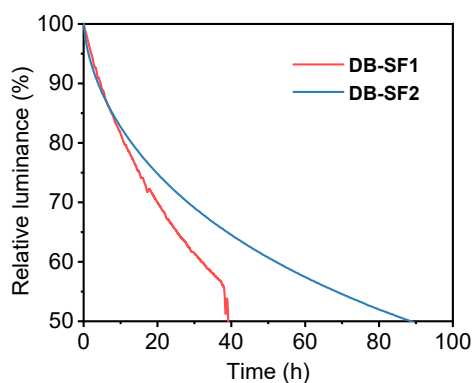

**Figure S20.** Operational lifetime measurement of the non-sensitized devices with 5 wt% doping ratio based on **DB-SF1** and **DB-SF2** at specified initial luminance of  $100 \text{ cd m}^{-2}$ .

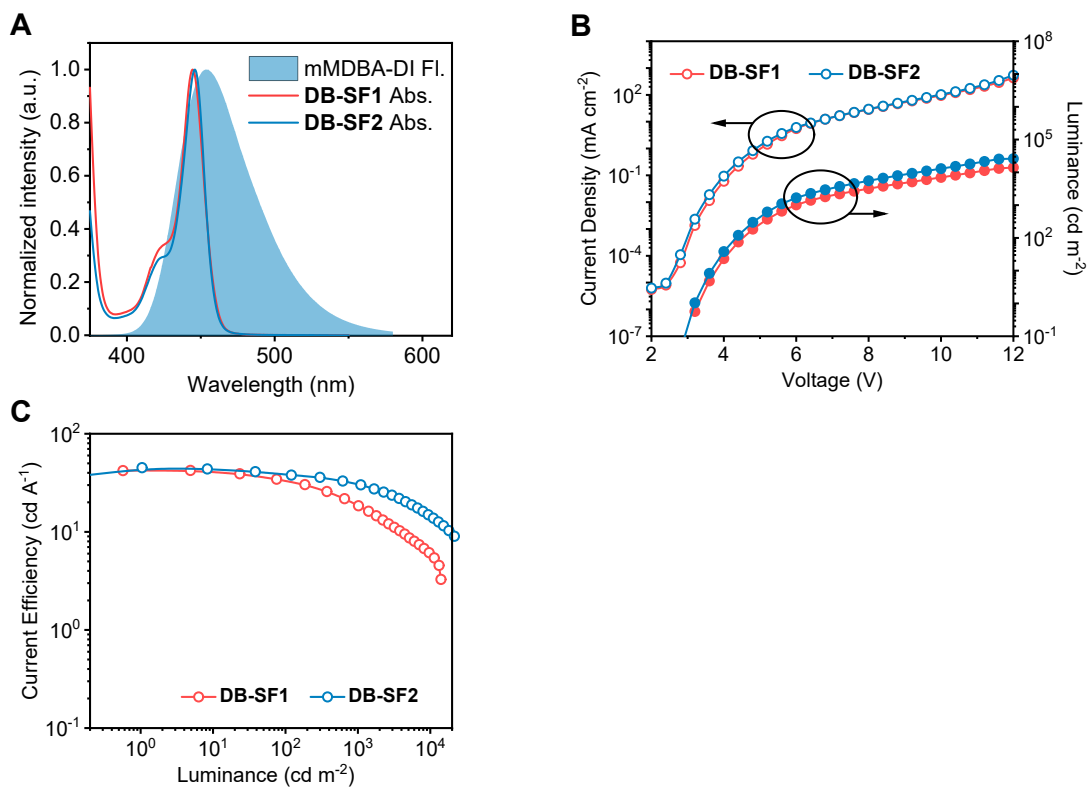

**Figure S21.** (A) Overlay of the sensitizer's PL spectrum with the absorption spectra of **DB-SF1** and **DB-SF2**. (B)  $J$ - $V$ - $L$ , and (C)  $CE$ - $L$  characteristics of **DB-SF1** and **DB-SF2** based hyperfluorescence devices.

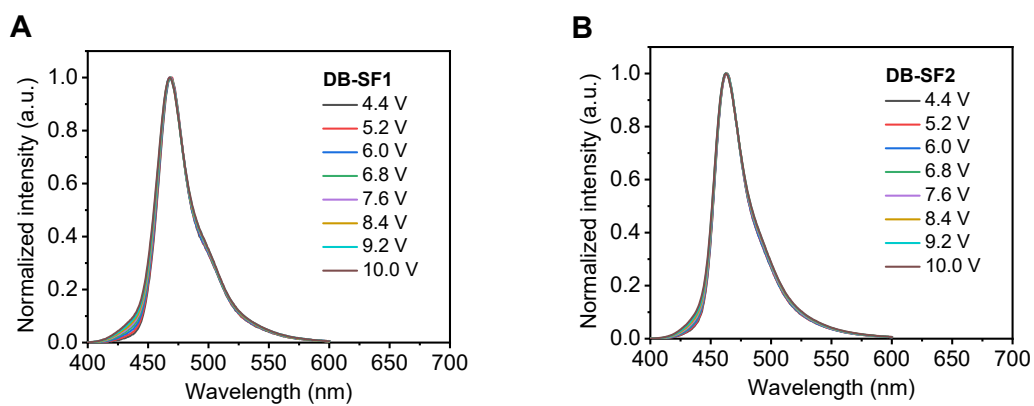

**Figure S22.** EL spectra of the hyperfluorescence devices based on (A) **DB-SF1**, (B) **DB-SF2** at different driving voltages.

**Table S1.** Crystal data and structure refinement for racemic **DB-SF1**.

---

|                                             |                                                                |
|---------------------------------------------|----------------------------------------------------------------|
| Empirical formula                           | C <sub>86</sub> H <sub>59</sub> B <sub>2</sub> N <sub>3</sub>  |
| Formula weight                              | 1155.98                                                        |
| Temperature/K                               | 170.00                                                         |
| Crystal system                              | triclinic                                                      |
| Space group                                 | P-1                                                            |
| a/Å                                         | 13.8977(6)                                                     |
| b/Å                                         | 16.6183(7)                                                     |
| c/Å                                         | 20.3259(8)                                                     |
| α/°                                         | 113.4050(10)                                                   |
| β/°                                         | 95.369(2)                                                      |
| γ/°                                         | 91.274(2)                                                      |
| Volume/Å <sup>3</sup>                       | 4280.2(3)                                                      |
| Z                                           | 2                                                              |
| ρ <sub>calc</sub> /g/cm <sup>3</sup>        | 0.897                                                          |
| μ/mm <sup>-1</sup>                          | 0.249                                                          |
| F(000)                                      | 1212.0                                                         |
| Crystal size/mm <sup>3</sup>                | 0.09 × 0.07 × 0.05                                             |
| Radiation                                   | GaKα (λ = 1.34139)                                             |
| 2θ range for data collection/°              | 4.148 to 121.496                                               |
| Index ranges                                | -18 ≤ h ≤ 18, -21 ≤ k ≤ 21, -26 ≤ l ≤ 26                       |
| Reflections collected                       | 93546                                                          |
| Independent reflections                     | 19549 [R <sub>int</sub> = 0.0610, R <sub>sigma</sub> = 0.0545] |
| Data/restraints/parameters                  | 19549/0/826                                                    |
| Goodness-of-fit on F <sup>2</sup>           | 1.040                                                          |
| Final R indexes [I ≥ 2σ (I)]                | R <sub>1</sub> = 0.0861, wR <sub>2</sub> = 0.2770              |
| Final R indexes [all data]                  | R <sub>1</sub> = 0.1026, wR <sub>2</sub> = 0.2896              |
| Largest diff. peak/hole / e Å <sup>-3</sup> | 0.44/-0.39                                                     |

---

**Table S2.** Crystal data and structure refinement for racemic **DB-SF2**.

---

|                                             |                                                                |
|---------------------------------------------|----------------------------------------------------------------|
| Empirical formula                           | C <sub>86</sub> H <sub>59</sub> B <sub>2</sub> N <sub>3</sub>  |
| Formula weight                              | 1155.98                                                        |
| Temperature/K                               | 170.00                                                         |
| Crystal system                              | triclinic                                                      |
| Space group                                 | P-1                                                            |
| a/Å                                         | 14.1931(11)                                                    |
| b/Å                                         | 16.6449(12)                                                    |
| c/Å                                         | 17.7614(14)                                                    |
| α/°                                         | 71.081(3)                                                      |
| β/°                                         | 69.022(4)                                                      |
| γ/°                                         | 78.650(4)                                                      |
| Volume/Å <sup>3</sup>                       | 3690.7(5)                                                      |
| Z                                           | 2                                                              |
| ρ <sub>calc</sub> /g/cm <sup>3</sup>        | 1.040                                                          |
| μ/mm <sup>-1</sup>                          | 0.289                                                          |
| F(000)                                      | 1212.0                                                         |
| Crystal size/mm <sup>3</sup>                | 0.16 × 0.02 × 0.02                                             |
| Radiation                                   | GaKα (λ = 1.34139)                                             |
| 2θ range for data collection/°              | 4.824 to 108.362                                               |
| Index ranges                                | -17 ≤ h ≤ 17, -18 ≤ k ≤ 20, -21 ≤ l ≤ 21                       |
| Reflections collected                       | 47417                                                          |
| Independent reflections                     | 13490 [R <sub>int</sub> = 0.1290, R <sub>sigma</sub> = 0.1657] |
| Data/restraints/parameters                  | 13490/0/826                                                    |
| Goodness-of-fit on F <sup>2</sup>           | 1.067                                                          |
| Final R indexes [I ≥ 2σ (I)]                | R <sub>1</sub> = 0.1112, wR <sub>2</sub> = 0.3059              |
| Final R indexes [all data]                  | R <sub>1</sub> = 0.1824, wR <sub>2</sub> = 0.3547              |
| Largest diff. peak/hole / e Å <sup>-3</sup> | 0.58/-0.40                                                     |

---

**Table S3.** Summary of TD-DFT data for **DB-SF1** and **DB-SF2**.

| Compound      | Transition                     | Wavelength (nm) | Energy (eV) | Oscillator Strength | Coefficient of Orbital                                                 |
|---------------|--------------------------------|-----------------|-------------|---------------------|------------------------------------------------------------------------|
| <b>DB-SF1</b> | S <sub>0</sub> -S <sub>1</sub> | 428.29          | 2.8949      | 0.0710              | HOMO→LUMO (0.9707)                                                     |
|               | S <sub>0</sub> -T <sub>1</sub> | 495.28          | 2.5033      | 0.0000              | HOMO-3→LUMO+1 (0.0228)<br>HOMO→LUMO (0.8653)                           |
|               | S <sub>0</sub> -T <sub>2</sub> | 475.36          | 2.6082      | 0.0000              | HOMO-1→LUMO (0.0318)<br>HOMO→LUMO+1 (0.8829)                           |
| <b>DB-SF2</b> | S <sub>0</sub> -S <sub>1</sub> | 419.27          | 2.9572      | 0.6759              | HOMO-1→LUMO+1 (0.0662)<br>HOMO→LUMO (0.9045)                           |
|               | S <sub>0</sub> -T <sub>1</sub> | 477.13          | 2.5985      | 0.0000              | HOMO-1→LUMO+1 (0.0321)<br>HOMO→LUMO (0.8895)                           |
|               | S <sub>0</sub> -T <sub>2</sub> | 475.44          | 2.6078      | 0.0000              | HOMO-2→LUMO+1 (0.0278)<br>HOMO→LUMO+1 (0.8553)<br>HOMO→LUMO+5 (0.0289) |

**Table S4.** Cartesian coordinates of **DB-SF1** at the optimized S<sub>0</sub> geometry.

| Center Number | Atomic Number | Atomic Type | Coordinates (Angstroms) |           |           |
|---------------|---------------|-------------|-------------------------|-----------|-----------|
|               |               |             | X                       | Y         | Z         |
| 1             | 6             | 0           | 1.203317                | 1.130044  | -0.093115 |
| 2             | 6             | 0           | -0.000008               | 1.835296  | -0.000231 |
| 3             | 6             | 0           | -1.203323               | 1.130037  | 0.092762  |
| 4             | 6             | 0           | -1.231491               | -0.288003 | 0.125253  |
| 5             | 6             | 0           | -0.000003               | -0.970713 | -0.000163 |
| 6             | 6             | 0           | 1.231485                | -0.288002 | -0.125553 |
| 7             | 5             | 0           | 2.532020                | -1.025915 | -0.289476 |
| 8             | 6             | 0           | 3.807066                | -0.177167 | -0.157536 |
| 9             | 6             | 0           | 3.668815                | 1.243792  | -0.147744 |
| 10            | 7             | 0           | 2.399261                | 1.841474  | -0.174059 |
| 11            | 7             | 0           | -0.000003               | -2.370844 | -0.000188 |
| 12            | 6             | 0           | 1.072400                | -3.079375 | -0.615795 |



|    |   |   |           |           |           |
|----|---|---|-----------|-----------|-----------|
| 13 | 6 | 0 | 2.364613  | -2.501129 | -0.713171 |
| 14 | 6 | 0 | 5.109372  | -0.712475 | -0.041133 |
| 15 | 6 | 0 | 6.214945  | 0.106424  | 0.017620  |
| 16 | 6 | 0 | 6.061699  | 1.507401  | -0.035075 |
| 17 | 6 | 0 | 4.802689  | 2.082788  | -0.108338 |
| 18 | 6 | 0 | 0.810053  | -4.326842 | -1.211957 |
| 19 | 6 | 0 | 1.823155  | -5.030576 | -1.845279 |
| 20 | 6 | 0 | 3.114432  | -4.497672 | -1.924219 |
| 21 | 6 | 0 | 3.360392  | -3.246272 | -1.380991 |
| 22 | 6 | 0 | 2.014956  | 5.187537  | -1.731694 |
| 23 | 6 | 0 | 1.908735  | 6.020624  | -0.612309 |
| 24 | 6 | 0 | 2.008691  | 5.448802  | 0.657819  |
| 25 | 6 | 0 | 2.200883  | 4.074164  | 0.831458  |
| 26 | 6 | 0 | 2.294697  | 3.272742  | -0.312243 |
| 27 | 6 | 0 | 2.203443  | 3.811240  | -1.604231 |
| 28 | 6 | 0 | -1.072395 | -3.079406 | 0.615419  |
| 29 | 6 | 0 | -2.364599 | -2.501140 | 0.712898  |
| 30 | 6 | 0 | -3.360354 | -3.246314 | 1.380709  |
| 31 | 6 | 0 | -3.114400 | -4.497774 | 1.923814  |
| 32 | 6 | 0 | -1.823146 | -5.030703 | 1.844754  |
| 33 | 6 | 0 | -0.810055 | -4.326935 | 1.211446  |
| 34 | 5 | 0 | -2.532019 | -1.025913 | 0.289247  |
| 35 | 6 | 0 | -3.807070 | -0.177156 | 0.157381  |
| 36 | 6 | 0 | -3.668815 | 1.243804  | 0.147580  |
| 37 | 7 | 0 | -2.399256 | 1.841475  | 0.173800  |
| 38 | 6 | 0 | -5.109392 | -0.712456 | 0.041081  |
| 39 | 6 | 0 | -6.214965 | 0.106447  | -0.017571 |
| 40 | 6 | 0 | -6.061711 | 1.507425  | 0.035123  |
| 41 | 6 | 0 | -4.802691 | 2.082802  | 0.108291  |
| 42 | 6 | 0 | -2.008855 | 5.448847  | -0.657968 |
| 43 | 6 | 0 | -1.908550 | 6.020590  | 0.612172  |
| 44 | 6 | 0 | -2.014440 | 5.187433  | 1.731533  |
| 45 | 6 | 0 | -2.203004 | 3.811147  | 1.604036  |
| 46 | 6 | 0 | -2.294644 | 3.272736  | 0.312042  |
| 47 | 6 | 0 | -2.201103 | 4.074222  | -0.831638 |
| 48 | 6 | 0 | -7.393062 | 2.123087  | -0.017416 |
| 49 | 6 | 0 | -8.357855 | 1.100503  | -0.102819 |
| 50 | 6 | 0 | -7.689417 | -0.273487 | -0.120368 |
| 51 | 6 | 0 | -8.153598 | -1.202680 | 0.999140  |
| 52 | 6 | 0 | -8.673234 | -2.398022 | 0.467877  |
| 53 | 6 | 0 | -8.595491 | -2.331835 | -0.998091 |

|    |   |   |            |           |           |
|----|---|---|------------|-----------|-----------|
| 54 | 6 | 0 | -8.025047  | -1.097665 | -1.361893 |
| 55 | 6 | 0 | 7.689387   | -0.273515 | 0.120560  |
| 56 | 6 | 0 | 8.357829   | 1.100472  | 0.103083  |
| 57 | 6 | 0 | 7.393048   | 2.123061  | 0.017597  |
| 58 | 6 | 0 | 8.153675   | -1.202712 | -0.998900 |
| 59 | 6 | 0 | 8.673240   | -2.398060 | -0.467584 |
| 60 | 6 | 0 | 8.595346   | -2.331873 | 0.998375  |
| 61 | 6 | 0 | 8.024881   | -1.097697 | 1.362119  |
| 62 | 6 | 0 | 8.974328   | -3.247447 | 1.980343  |
| 63 | 6 | 0 | 8.776882   | -2.914317 | 3.322028  |
| 64 | 6 | 0 | 8.209335   | -1.686017 | 3.677823  |
| 65 | 6 | 0 | 7.828362   | -0.767082 | 2.694628  |
| 66 | 6 | 0 | 8.096482   | -0.996006 | -2.369259 |
| 67 | 6 | 0 | 8.569059   | -2.000265 | -3.220553 |
| 68 | 6 | 0 | 9.087728   | -3.189903 | -2.697818 |
| 69 | 6 | 0 | 9.143780   | -3.398816 | -1.318140 |
| 70 | 6 | 0 | 9.710672   | 1.401488  | 0.162699  |
| 71 | 6 | 0 | 10.102067  | 2.744031  | 0.136687  |
| 72 | 6 | 0 | 9.147120   | 3.763657  | 0.052422  |
| 73 | 6 | 0 | 7.785424   | 3.461958  | -0.007819 |
| 74 | 6 | 0 | -7.785431  | 3.461986  | 0.008037  |
| 75 | 6 | 0 | -9.147131  | 3.763691  | -0.052076 |
| 76 | 6 | 0 | -10.102090 | 2.744067  | -0.136254 |
| 77 | 6 | 0 | -9.710702  | 1.401524  | -0.162309 |
| 78 | 6 | 0 | -8.974587  | -3.247403 | -1.980020 |
| 79 | 6 | 0 | -8.777273  | -2.914275 | -3.321724 |
| 80 | 6 | 0 | -8.209745  | -1.685984 | -3.677578 |
| 81 | 6 | 0 | -7.828658  | -0.767055 | -2.694422 |
| 82 | 6 | 0 | -8.096258  | -0.995977 | 2.369494  |
| 83 | 6 | 0 | -8.568757  | -2.000232 | 3.220835  |
| 84 | 6 | 0 | -9.087495  | -3.189864 | 2.698153  |
| 85 | 6 | 0 | -9.143696  | -3.398772 | 1.318482  |
| 86 | 1 | 0 | -0.000019  | 2.911375  | -0.000295 |
| 87 | 1 | 0 | 5.234955   | -1.788034 | 0.015994  |
| 88 | 1 | 0 | 4.686805   | 3.159316  | -0.123772 |
| 89 | 1 | 0 | -0.193874  | -4.731045 | -1.198126 |
| 90 | 1 | 0 | 1.595635   | -5.987018 | -2.306478 |
| 91 | 1 | 0 | 3.903622   | -5.041204 | -2.434080 |
| 92 | 1 | 0 | 4.340720   | -2.802413 | -1.510427 |
| 93 | 1 | 0 | 1.939263   | 5.618309  | -2.727039 |
| 94 | 1 | 0 | 1.926217   | 6.082526  | 1.536853  |

|     |   |   |            |           |           |
|-----|---|---|------------|-----------|-----------|
| 95  | 1 | 0 | -4.340661  | -2.802440 | 1.510246  |
| 96  | 1 | 0 | -3.903584  | -5.041328 | 2.433659  |
| 97  | 1 | 0 | -1.595619  | -5.987191 | 2.305851  |
| 98  | 1 | 0 | 0.193858   | -4.731170 | 1.197536  |
| 99  | 1 | 0 | -5.234986  | -1.788012 | -0.016044 |
| 100 | 1 | 0 | -4.686801  | 3.159329  | 0.123741  |
| 101 | 1 | 0 | -1.926583  | 6.082622  | -1.536986 |
| 102 | 1 | 0 | -1.938441  | 5.618140  | 2.726883  |
| 103 | 1 | 0 | 9.414124   | -4.202686 | 1.709227  |
| 104 | 1 | 0 | 9.065940   | -3.616565 | 4.098014  |
| 105 | 1 | 0 | 8.062359   | -1.445116 | 4.726133  |
| 106 | 1 | 0 | 7.385612   | 0.186721  | 2.965177  |
| 107 | 1 | 0 | 7.689778   | -0.072228 | -2.769531 |
| 108 | 1 | 0 | 8.532061   | -1.856342 | -4.295969 |
| 109 | 1 | 0 | 9.449362   | -3.959695 | -3.372778 |
| 110 | 1 | 0 | 9.544898   | -4.325075 | -0.917463 |
| 111 | 1 | 0 | 10.448355  | 0.607556  | 0.228633  |
| 112 | 1 | 0 | 11.156602  | 2.998049  | 0.182361  |
| 113 | 1 | 0 | 9.469612   | 4.800245  | 0.033320  |
| 114 | 1 | 0 | 7.046540   | 4.255129  | -0.074308 |
| 115 | 1 | 0 | -7.046538  | 4.255155  | 0.074457  |
| 116 | 1 | 0 | -9.469618  | 4.800281  | -0.032943 |
| 117 | 1 | 0 | -11.156629 | 2.998090  | -0.181830 |
| 118 | 1 | 0 | -10.448394 | 0.607595  | -0.228179 |
| 119 | 1 | 0 | -9.414369  | -4.202634 | -1.708859 |
| 120 | 1 | 0 | -9.066421  | -3.616519 | -4.097682 |
| 121 | 1 | 0 | -8.062872  | -1.445086 | -4.725903 |
| 122 | 1 | 0 | -7.385923  | 0.186743  | -2.965016 |
| 123 | 1 | 0 | -7.689499  | -0.072206 | 2.769723  |
| 124 | 1 | 0 | -8.531641  | -1.856312 | 4.296247  |
| 125 | 1 | 0 | -9.449066  | -3.959651 | 3.373150  |
| 126 | 1 | 0 | -9.544869  | -4.325026 | 0.917844  |
| 127 | 1 | 0 | 2.274049   | 3.647738  | 1.810083  |
| 128 | 1 | 0 | 1.754244   | 7.073168  | -0.727131 |
| 129 | 1 | 0 | 2.276374   | 3.183849  | -2.467922 |
| 130 | 1 | 0 | -1.754044  | 7.073129  | 0.727017  |
| 131 | 1 | 0 | -2.274511  | 3.647853  | -1.810270 |
| 132 | 1 | 0 | -2.275706  | 3.183703  | 2.467708  |

**Table S5.** Cartesian coordinates of **DB-SF1** at the optimized  $S_1$  geometry.

| Center<br>Number | Atomic<br>Number | Atomic<br>Type | Coordinates (Angstroms) |           |           |
|------------------|------------------|----------------|-------------------------|-----------|-----------|
|                  |                  |                | X                       | Y         | Z         |
| 1                | 6                | 0              | 1.203317                | 1.130044  | -0.093115 |
| 2                | 6                | 0              | -0.000008               | 1.835296  | -0.000231 |
| 3                | 6                | 0              | -1.203323               | 1.130037  | 0.092762  |
| 4                | 6                | 0              | -1.231491               | -0.288003 | 0.125253  |
| 5                | 6                | 0              | -0.000003               | -0.970713 | -0.000163 |
| 6                | 6                | 0              | 1.231485                | -0.288002 | -0.125553 |
| 7                | 5                | 0              | 2.532020                | -1.025915 | -0.289476 |
| 8                | 6                | 0              | 3.807066                | -0.177167 | -0.157536 |
| 9                | 6                | 0              | 3.668815                | 1.243792  | -0.147744 |
| 10               | 7                | 0              | 2.399261                | 1.841474  | -0.174059 |
| 11               | 7                | 0              | -0.000003               | -2.370844 | -0.000188 |
| 12               | 6                | 0              | 1.072400                | -3.079375 | -0.615795 |
| 13               | 6                | 0              | 2.364613                | -2.501129 | -0.713171 |
| 14               | 6                | 0              | 5.109372                | -0.712475 | -0.041133 |
| 15               | 6                | 0              | 6.214945                | 0.106424  | 0.017620  |
| 16               | 6                | 0              | 6.061699                | 1.507401  | -0.035075 |
| 17               | 6                | 0              | 4.802689                | 2.082788  | -0.108338 |
| 18               | 6                | 0              | 0.810053                | -4.326842 | -1.211957 |
| 19               | 6                | 0              | 1.823155                | -5.030576 | -1.845279 |
| 20               | 6                | 0              | 3.114432                | -4.497672 | -1.924219 |
| 21               | 6                | 0              | 3.360392                | -3.246272 | -1.380991 |
| 22               | 6                | 0              | 2.014956                | 5.187537  | -1.731694 |
| 23               | 6                | 0              | 1.908735                | 6.020624  | -0.612309 |
| 24               | 6                | 0              | 2.008691                | 5.448802  | 0.657819  |
| 25               | 6                | 0              | 2.200883                | 4.074164  | 0.831458  |
| 26               | 6                | 0              | 2.294697                | 3.272742  | -0.312243 |
| 27               | 6                | 0              | 2.203443                | 3.811240  | -1.604231 |
| 28               | 6                | 0              | -1.072395               | -3.079406 | 0.615419  |
| 29               | 6                | 0              | -2.364599               | -2.501140 | 0.712898  |
| 30               | 6                | 0              | -3.360354               | -3.246314 | 1.380709  |
| 31               | 6                | 0              | -3.114400               | -4.497774 | 1.923814  |
| 32               | 6                | 0              | -1.823146               | -5.030703 | 1.844754  |
| 33               | 6                | 0              | -0.810055               | -4.326935 | 1.211446  |
| 34               | 5                | 0              | -2.532019               | -1.025913 | 0.289247  |
| 35               | 6                | 0              | -3.807070               | -0.177156 | 0.157381  |

|    |   |   |            |           |           |
|----|---|---|------------|-----------|-----------|
| 36 | 6 | 0 | -3.668815  | 1.243804  | 0.147580  |
| 37 | 7 | 0 | -2.399256  | 1.841475  | 0.173800  |
| 38 | 6 | 0 | -5.109392  | -0.712456 | 0.041081  |
| 39 | 6 | 0 | -6.214965  | 0.106447  | -0.017571 |
| 40 | 6 | 0 | -6.061711  | 1.507425  | 0.035123  |
| 41 | 6 | 0 | -4.802691  | 2.082802  | 0.108291  |
| 42 | 6 | 0 | -2.008855  | 5.448847  | -0.657968 |
| 43 | 6 | 0 | -1.908550  | 6.020590  | 0.612172  |
| 44 | 6 | 0 | -2.014440  | 5.187433  | 1.731533  |
| 45 | 6 | 0 | -2.203004  | 3.811147  | 1.604036  |
| 46 | 6 | 0 | -2.294644  | 3.272736  | 0.312042  |
| 47 | 6 | 0 | -2.201103  | 4.074222  | -0.831638 |
| 48 | 6 | 0 | -7.393062  | 2.123087  | -0.017416 |
| 49 | 6 | 0 | -8.357855  | 1.100503  | -0.102819 |
| 50 | 6 | 0 | -7.689417  | -0.273487 | -0.120368 |
| 51 | 6 | 0 | -8.153598  | -1.202680 | 0.999140  |
| 52 | 6 | 0 | -8.673234  | -2.398022 | 0.467877  |
| 53 | 6 | 0 | -8.595491  | -2.331835 | -0.998091 |
| 54 | 6 | 0 | -8.025047  | -1.097665 | -1.361893 |
| 55 | 6 | 0 | 7.689387   | -0.273515 | 0.120560  |
| 56 | 6 | 0 | 8.357829   | 1.100472  | 0.103083  |
| 57 | 6 | 0 | 7.393048   | 2.123061  | 0.017597  |
| 58 | 6 | 0 | 8.153675   | -1.202712 | -0.998900 |
| 59 | 6 | 0 | 8.673240   | -2.398060 | -0.467584 |
| 60 | 6 | 0 | 8.595346   | -2.331873 | 0.998375  |
| 61 | 6 | 0 | 8.024881   | -1.097697 | 1.362119  |
| 62 | 6 | 0 | 8.974328   | -3.247447 | 1.980343  |
| 63 | 6 | 0 | 8.776882   | -2.914317 | 3.322028  |
| 64 | 6 | 0 | 8.209335   | -1.686017 | 3.677823  |
| 65 | 6 | 0 | 7.828362   | -0.767082 | 2.694628  |
| 66 | 6 | 0 | 8.096482   | -0.996006 | -2.369259 |
| 67 | 6 | 0 | 8.569059   | -2.000265 | -3.220553 |
| 68 | 6 | 0 | 9.087728   | -3.189903 | -2.697818 |
| 69 | 6 | 0 | 9.143780   | -3.398816 | -1.318140 |
| 70 | 6 | 0 | 9.710672   | 1.401488  | 0.162699  |
| 71 | 6 | 0 | 10.102067  | 2.744031  | 0.136687  |
| 72 | 6 | 0 | 9.147120   | 3.763657  | 0.052422  |
| 73 | 6 | 0 | 7.785424   | 3.461958  | -0.007819 |
| 74 | 6 | 0 | -7.785431  | 3.461986  | 0.008037  |
| 75 | 6 | 0 | -9.147131  | 3.763691  | -0.052076 |
| 76 | 6 | 0 | -10.102090 | 2.744067  | -0.136254 |

|     |   |   |            |           |           |
|-----|---|---|------------|-----------|-----------|
| 77  | 6 | 0 | -9.710702  | 1.401524  | -0.162309 |
| 78  | 6 | 0 | -8.974587  | -3.247403 | -1.980020 |
| 79  | 6 | 0 | -8.777273  | -2.914275 | -3.321724 |
| 80  | 6 | 0 | -8.209745  | -1.685984 | -3.677578 |
| 81  | 6 | 0 | -7.828658  | -0.767055 | -2.694422 |
| 82  | 6 | 0 | -8.096258  | -0.995977 | 2.369494  |
| 83  | 6 | 0 | -8.568757  | -2.000232 | 3.220835  |
| 84  | 6 | 0 | -9.087495  | -3.189864 | 2.698153  |
| 85  | 6 | 0 | -9.143696  | -3.398772 | 1.318482  |
| 86  | 1 | 0 | -0.000019  | 2.911375  | -0.000295 |
| 87  | 1 | 0 | 5.234955   | -1.788034 | 0.015994  |
| 88  | 1 | 0 | 4.686805   | 3.159316  | -0.123772 |
| 89  | 1 | 0 | -0.193874  | -4.731045 | -1.198126 |
| 90  | 1 | 0 | 1.595635   | -5.987018 | -2.306478 |
| 91  | 1 | 0 | 3.903622   | -5.041204 | -2.434080 |
| 92  | 1 | 0 | 4.340720   | -2.802413 | -1.510427 |
| 93  | 1 | 0 | 1.939263   | 5.618309  | -2.727039 |
| 94  | 1 | 0 | 1.926217   | 6.082526  | 1.536853  |
| 95  | 1 | 0 | -4.340661  | -2.802440 | 1.510246  |
| 96  | 1 | 0 | -3.903584  | -5.041328 | 2.433659  |
| 97  | 1 | 0 | -1.595619  | -5.987191 | 2.305851  |
| 98  | 1 | 0 | 0.193858   | -4.731170 | 1.197536  |
| 99  | 1 | 0 | -5.234986  | -1.788012 | -0.016044 |
| 100 | 1 | 0 | -4.686801  | 3.159329  | 0.123741  |
| 101 | 1 | 0 | -1.926583  | 6.082622  | -1.536986 |
| 102 | 1 | 0 | -1.938441  | 5.618140  | 2.726883  |
| 103 | 1 | 0 | 9.414124   | -4.202686 | 1.709227  |
| 104 | 1 | 0 | 9.065940   | -3.616565 | 4.098014  |
| 105 | 1 | 0 | 8.062359   | -1.445116 | 4.726133  |
| 106 | 1 | 0 | 7.385612   | 0.186721  | 2.965177  |
| 107 | 1 | 0 | 7.689778   | -0.072228 | -2.769531 |
| 108 | 1 | 0 | 8.532061   | -1.856342 | -4.295969 |
| 109 | 1 | 0 | 9.449362   | -3.959695 | -3.372778 |
| 110 | 1 | 0 | 9.544898   | -4.325075 | -0.917463 |
| 111 | 1 | 0 | 10.448355  | 0.607556  | 0.228633  |
| 112 | 1 | 0 | 11.156602  | 2.998049  | 0.182361  |
| 113 | 1 | 0 | 9.469612   | 4.800245  | 0.033320  |
| 114 | 1 | 0 | 7.046540   | 4.255129  | -0.074308 |
| 115 | 1 | 0 | -7.046538  | 4.255155  | 0.074457  |
| 116 | 1 | 0 | -9.469618  | 4.800281  | -0.032943 |
| 117 | 1 | 0 | -11.156629 | 2.998090  | -0.181830 |

|     |   |   |            |           |           |
|-----|---|---|------------|-----------|-----------|
| 118 | 1 | 0 | -10.448394 | 0.607595  | -0.228179 |
| 119 | 1 | 0 | -9.414369  | -4.202634 | -1.708859 |
| 120 | 1 | 0 | -9.066421  | -3.616519 | -4.097682 |
| 121 | 1 | 0 | -8.062872  | -1.445086 | -4.725903 |
| 122 | 1 | 0 | -7.385923  | 0.186743  | -2.965016 |
| 123 | 1 | 0 | -7.689499  | -0.072206 | 2.769723  |
| 124 | 1 | 0 | -8.531641  | -1.856312 | 4.296247  |
| 125 | 1 | 0 | -9.449066  | -3.959651 | 3.373150  |
| 126 | 1 | 0 | -9.544869  | -4.325026 | 0.917844  |
| 127 | 1 | 0 | 2.274049   | 3.647738  | 1.810083  |
| 128 | 1 | 0 | 1.754244   | 7.073168  | -0.727131 |
| 129 | 1 | 0 | 2.276374   | 3.183849  | -2.467922 |
| 130 | 1 | 0 | -1.754044  | 7.073129  | 0.727017  |
| 131 | 1 | 0 | -2.274511  | 3.647853  | -1.810270 |
| 132 | 1 | 0 | -2.275706  | 3.183703  | 2.467708  |

-----  
**Table S6.** Cartesian coordinates of **DB-SF2** at the optimized  $S_0$  geometry.

| Center<br>Number | Atomic<br>Number | Atomic<br>Type | Coordinates (Angstroms) |           |           |
|------------------|------------------|----------------|-------------------------|-----------|-----------|
|                  |                  |                | X                       | Y         | Z         |
| 1                | 6                | 0              | 1.201486                | 0.365425  | 0.105746  |
| 2                | 6                | 0              | -0.000023               | -0.340975 | 0.000133  |
| 3                | 6                | 0              | -1.201518               | 0.365439  | -0.105611 |
| 4                | 6                | 0              | -0.000004               | 2.466389  | 0.000019  |
| 5                | 6                | 0              | 1.229445                | 1.783903  | 0.147012  |
| 6                | 5                | 0              | 2.527513                | 2.522379  | 0.331045  |
| 7                | 6                | 0              | 3.807493                | 1.677042  | 0.204902  |
| 8                | 6                | 0              | 3.663223                | 0.256863  | 0.173984  |
| 9                | 7                | 0              | 2.397550                | -0.343765 | 0.183353  |
| 10               | 7                | 0              | 0.000001                | 3.867017  | 0.000005  |
| 11               | 6                | 0              | 1.060633                | 4.575303  | 0.634431  |
| 12               | 6                | 0              | 2.350732                | 3.996976  | 0.753806  |
| 13               | 6                | 0              | 5.108752                | 2.211521  | 0.085546  |
| 14               | 6                | 0              | 6.220140                | 1.388545  | -0.015741 |
| 15               | 6                | 0              | 6.043181                | -0.010216 | 0.018008  |
| 16               | 6                | 0              | 4.796839                | -0.583285 | 0.114601  |
| 17               | 6                | 0              | 0.788046                | 5.822597  | 1.226475  |
| 18               | 6                | 0              | 1.789549                | 6.526000  | 1.878213  |
| 19               | 6                | 0              | 3.079116                | 5.992757  | 1.979892  |

|    |   |   |           |           |           |
|----|---|---|-----------|-----------|-----------|
| 20 | 6 | 0 | 3.333998  | 4.741876  | 1.439438  |
| 21 | 6 | 0 | 1.968103  | -3.820207 | 1.418417  |
| 22 | 6 | 0 | 1.974915  | -4.553488 | 0.228269  |
| 23 | 6 | 0 | 2.150088  | -3.869326 | -0.977724 |
| 24 | 6 | 0 | 2.316977  | -2.483028 | -1.017761 |
| 25 | 6 | 0 | 2.304986  | -1.783514 | 0.196410  |
| 26 | 6 | 0 | 2.132209  | -2.433627 | 1.425222  |
| 27 | 6 | 0 | -1.060613 | 4.575283  | -0.634451 |
| 28 | 6 | 0 | -2.350748 | 3.996995  | -0.753738 |
| 29 | 6 | 0 | -3.334006 | 4.741907  | -1.439354 |
| 30 | 6 | 0 | -3.079092 | 5.992745  | -1.979906 |
| 31 | 6 | 0 | -1.789494 | 6.525922  | -1.878353 |
| 32 | 6 | 0 | -0.787993 | 5.822507  | -1.226615 |
| 33 | 5 | 0 | -2.527534 | 2.522398  | -0.330962 |
| 34 | 6 | 0 | -3.807516 | 1.677066  | -0.204833 |
| 35 | 6 | 0 | -3.663246 | 0.256878  | -0.174001 |
| 36 | 7 | 0 | -2.397580 | -0.343752 | -0.183281 |
| 37 | 6 | 0 | -5.108779 | 2.211533  | -0.085489 |
| 38 | 6 | 0 | -6.220175 | 1.388555  | 0.015702  |
| 39 | 6 | 0 | -6.043215 | -0.010202 | -0.018147 |
| 40 | 6 | 0 | -4.796875 | -0.583267 | -0.114760 |
| 41 | 6 | 0 | -2.150563 | -3.869390 | 0.977692  |
| 42 | 6 | 0 | -1.975030 | -4.553488 | -0.228279 |
| 43 | 6 | 0 | -1.967790 | -3.820134 | -1.418384 |
| 44 | 6 | 0 | -2.131855 | -2.433554 | -1.425166 |
| 45 | 6 | 0 | -2.305012 | -1.783500 | -0.196368 |
| 46 | 6 | 0 | -2.317412 | -2.483083 | 1.017757  |
| 47 | 6 | 0 | -1.229466 | 1.783910  | -0.146959 |
| 48 | 6 | 0 | 7.651869  | 1.671567  | -0.173440 |
| 49 | 6 | 0 | 8.349407  | 0.448350  | -0.239445 |
| 50 | 6 | 0 | 7.383476  | -0.728333 | -0.122424 |
| 51 | 6 | 0 | -7.383504 | -0.728333 | 0.122310  |
| 52 | 6 | 0 | -8.349440 | 0.448344  | 0.239349  |
| 53 | 6 | 0 | -7.651902 | 1.671567  | 0.173409  |
| 54 | 6 | 0 | 7.395279  | -1.685597 | -1.311905 |
| 55 | 6 | 0 | 7.621857  | -3.006357 | -0.881790 |
| 56 | 6 | 0 | 7.800965  | -2.999555 | 0.576779  |
| 57 | 6 | 0 | 7.677391  | -1.675237 | 1.037948  |
| 58 | 6 | 0 | -7.395191 | -1.685528 | 1.311857  |
| 59 | 6 | 0 | -7.621689 | -3.006328 | 0.881826  |
| 60 | 6 | 0 | -7.800905 | -2.999615 | -0.576730 |



|     |   |   |            |           |           |
|-----|---|---|------------|-----------|-----------|
| 61  | 6 | 0 | -7.677452  | -1.675310 | -1.037977 |
| 62  | 6 | 0 | 8.051394   | -4.035865 | 1.476442  |
| 63  | 6 | 0 | 8.177055   | -3.732021 | 2.833697  |
| 64  | 6 | 0 | 8.054826   | -2.413716 | 3.285994  |
| 65  | 6 | 0 | 7.802392   | -1.373309 | 2.385837  |
| 66  | 6 | 0 | 7.181541   | -1.396330 | -2.651625 |
| 67  | 6 | 0 | 7.197822   | -2.446390 | -3.575637 |
| 68  | 6 | 0 | 7.423349   | -3.761414 | -3.154107 |
| 69  | 6 | 0 | 7.637102   | -4.052233 | -1.805091 |
| 70  | 6 | 0 | 8.346554   | 2.878555  | -0.260731 |
| 71  | 6 | 0 | 9.734595   | 2.847254  | -0.412883 |
| 72  | 6 | 0 | 10.421363  | 1.630341  | -0.477151 |
| 73  | 6 | 0 | 9.727486   | 0.418375  | -0.389973 |
| 74  | 6 | 0 | -9.727523  | 0.418361  | 0.389842  |
| 75  | 6 | 0 | -10.421404 | 1.630322  | 0.477055  |
| 76  | 6 | 0 | -9.734637  | 2.847239  | 0.412855  |
| 77  | 6 | 0 | -8.346592  | 2.878548  | 0.260733  |
| 78  | 6 | 0 | -7.181373  | -1.396172 | 2.651546  |
| 79  | 6 | 0 | -7.197497  | -2.446186 | 3.575613  |
| 80  | 6 | 0 | -7.422945  | -3.761252 | 3.154168  |
| 81  | 6 | 0 | -7.636776  | -4.052157 | 1.805184  |
| 82  | 6 | 0 | -8.051380  | -4.035980 | -1.476312 |
| 83  | 6 | 0 | -8.177213  | -3.732212 | -2.833569 |
| 84  | 6 | 0 | -8.055111  | -2.413921 | -3.285944 |
| 85  | 6 | 0 | -7.802632  | -1.373457 | -2.385866 |
| 86  | 1 | 0 | -0.000041  | -1.417322 | 0.000196  |
| 87  | 1 | 0 | 5.227529   | 3.288892  | 0.043691  |
| 88  | 1 | 0 | 4.689797   | -1.660529 | 0.114061  |
| 89  | 1 | 0 | -0.215426  | 6.226957  | 1.194997  |
| 90  | 1 | 0 | 1.554042   | 7.482096  | 2.336004  |
| 91  | 1 | 0 | 3.858340   | 6.535998  | 2.505262  |
| 92  | 1 | 0 | 4.310901   | 4.295144  | 1.584999  |
| 93  | 1 | 0 | 1.825768   | -4.337480 | 2.363717  |
| 94  | 1 | 0 | 2.150995   | -4.425147 | -1.911655 |
| 95  | 1 | 0 | -4.310943  | 4.295227  | -1.584842 |
| 96  | 1 | 0 | -3.858329  | 6.535986  | -2.505258 |
| 97  | 1 | 0 | -1.553948  | 7.481962  | -2.336241 |
| 98  | 1 | 0 | 0.215507   | 6.226811  | -1.195221 |
| 99  | 1 | 0 | -5.227561  | 3.288900  | -0.043550 |
| 100 | 1 | 0 | -4.689840  | -1.660511 | -0.114294 |
| 101 | 1 | 0 | -2.151784  | -4.425256 | 1.911597  |

|     |   |   |            |           |           |
|-----|---|---|------------|-----------|-----------|
| 102 | 1 | 0 | -1.825193  | -4.337368 | -2.363666 |
| 103 | 1 | 0 | 8.147899   | -5.060753 | 1.130431  |
| 104 | 1 | 0 | 8.372831   | -4.527533 | 3.546272  |
| 105 | 1 | 0 | 8.156875   | -2.196801 | 4.344823  |
| 106 | 1 | 0 | 7.705712   | -0.348516 | 2.731278  |
| 107 | 1 | 0 | 7.004760   | -0.374099 | -2.972194 |
| 108 | 1 | 0 | 7.034360   | -2.239587 | -4.628779 |
| 109 | 1 | 0 | 7.432020   | -4.564693 | -3.884597 |
| 110 | 1 | 0 | 7.809543   | -5.074960 | -1.483036 |
| 111 | 1 | 0 | 7.818869   | 3.826456  | -0.211762 |
| 112 | 1 | 0 | 10.287591  | 3.779182  | -0.482191 |
| 113 | 1 | 0 | 11.500466  | 1.626392  | -0.595442 |
| 114 | 1 | 0 | 10.255038  | -0.529502 | -0.438923 |
| 115 | 1 | 0 | -10.255077 | -0.529518 | 0.438732  |
| 116 | 1 | 0 | -11.500510 | 1.626366  | 0.595319  |
| 117 | 1 | 0 | -10.287637 | 3.779163  | 0.482187  |
| 118 | 1 | 0 | -7.818909  | 3.826453  | 0.211808  |
| 119 | 1 | 0 | -7.004648  | -0.373910 | 2.972048  |
| 120 | 1 | 0 | -7.033977  | -2.239315 | 4.628733  |
| 121 | 1 | 0 | -7.431494  | -4.564494 | 3.884701  |
| 122 | 1 | 0 | -7.809152  | -5.074916 | 1.483193  |
| 123 | 1 | 0 | -8.147792  | -5.060857 | -1.130240 |
| 124 | 1 | 0 | -8.373029  | -4.527769 | -3.546082 |
| 125 | 1 | 0 | -8.157299  | -2.197063 | -4.344771 |
| 126 | 1 | 0 | -7.706051  | -0.348676 | -2.731371 |
| 127 | 1 | 0 | -2.450685  | -1.970739 | 1.947618  |
| 128 | 1 | 0 | -2.125505  | -1.883188 | -2.342748 |
| 129 | 1 | 0 | -1.848864  | -5.615955 | -0.240411 |
| 130 | 1 | 0 | 2.126173   | -1.883310 | 2.342835  |
| 131 | 1 | 0 | 2.449979   | -1.970636 | -1.947635 |
| 132 | 1 | 0 | 1.848701   | -5.615949 | 0.240379  |

-----

**Table S7.** Cartesian coordinates of **DB-SF2** at the optimized  $S_1$  geometry.

| Center<br>Number | Atomic<br>Number | Atomic<br>Type | Coordinates (Angstroms) |           |           |
|------------------|------------------|----------------|-------------------------|-----------|-----------|
|                  |                  |                | X                       | Y         | Z         |
| 1                | 6                | 0              | -1.203014               | 0.339270  | -0.092563 |
| 2                | 6                | 0              | 0.000000                | -0.367339 | -0.000002 |
| 3                | 6                | 0              | 1.203014                | 0.339269  | 0.092560  |

|    |   |   |           |           |           |
|----|---|---|-----------|-----------|-----------|
| 4  | 6 | 0 | 0.000000  | 2.439581  | -0.000001 |
| 5  | 6 | 0 | -1.230316 | 1.757657  | -0.137959 |
| 6  | 5 | 0 | -2.527342 | 2.498809  | -0.320698 |
| 7  | 6 | 0 | -3.809942 | 1.659913  | -0.183095 |
| 8  | 6 | 0 | -3.674429 | 0.239809  | -0.136989 |
| 9  | 7 | 0 | -2.406991 | -0.363898 | -0.155658 |
| 10 | 7 | 0 | 0.000000  | 3.840534  | -0.000001 |
| 11 | 6 | 0 | -1.059505 | 4.548534  | -0.635459 |
| 12 | 6 | 0 | -2.349534 | 3.970447  | -0.753776 |
| 13 | 6 | 0 | -5.107476 | 2.204356  | -0.072635 |
| 14 | 6 | 0 | -6.225021 | 1.390605  | 0.027266  |
| 15 | 6 | 0 | -6.058370 | -0.009948 | 0.013527  |
| 16 | 6 | 0 | -4.813956 | -0.592228 | -0.062701 |
| 17 | 6 | 0 | -0.785701 | 5.794653  | -1.229418 |
| 18 | 6 | 0 | -1.785957 | 6.496308  | -1.884835 |
| 19 | 6 | 0 | -3.075013 | 5.962153  | -1.988296 |
| 20 | 6 | 0 | -3.331203 | 4.713064  | -1.444307 |
| 21 | 6 | 0 | -2.083530 | -3.875112 | -1.354070 |
| 22 | 6 | 0 | -2.032699 | -4.567944 | -0.143775 |
| 23 | 6 | 0 | -2.137788 | -3.874845 | 1.063362  |
| 24 | 6 | 0 | -2.283867 | -2.488651 | 1.062137  |
| 25 | 6 | 0 | -2.324168 | -1.800567 | -0.150875 |
| 26 | 6 | 0 | -2.229565 | -2.488236 | -1.359810 |
| 27 | 6 | 0 | 1.059506  | 4.548534  | 0.635458  |
| 28 | 6 | 0 | 2.349534  | 3.970446  | 0.753774  |
| 29 | 6 | 0 | 3.331203  | 4.713064  | 1.444304  |
| 30 | 6 | 0 | 3.075014  | 5.962152  | 1.988294  |
| 31 | 6 | 0 | 1.785958  | 6.496307  | 1.884834  |
| 32 | 6 | 0 | 0.785701  | 5.794653  | 1.229418  |
| 33 | 5 | 0 | 2.527342  | 2.498809  | 0.320697  |
| 34 | 6 | 0 | 3.809942  | 1.659913  | 0.183094  |
| 35 | 6 | 0 | 3.674429  | 0.239809  | 0.136987  |
| 36 | 7 | 0 | 2.406991  | -0.363898 | 0.155655  |
| 37 | 6 | 0 | 5.107475  | 2.204355  | 0.072634  |
| 38 | 6 | 0 | 6.225020  | 1.390605  | -0.027266 |
| 39 | 6 | 0 | 6.058370  | -0.009948 | -0.013527 |
| 40 | 6 | 0 | 4.813956  | -0.592228 | 0.062700  |
| 41 | 6 | 0 | 2.137790  | -3.874844 | -1.063370 |
| 42 | 6 | 0 | 2.032697  | -4.567944 | 0.143765  |
| 43 | 6 | 0 | 2.083524  | -3.875113 | 1.354061  |
| 44 | 6 | 0 | 2.229560  | -2.488237 | 1.359803  |

|    |   |   |            |           |           |
|----|---|---|------------|-----------|-----------|
| 45 | 6 | 0 | 2.324168   | -1.800567 | 0.150870  |
| 46 | 6 | 0 | 2.283870   | -2.488650 | -1.062142 |
| 47 | 6 | 0 | 1.230315   | 1.757657  | 0.137957  |
| 48 | 6 | 0 | -7.656452  | 1.688815  | 0.153208  |
| 49 | 6 | 0 | -8.366890  | 0.473296  | 0.210579  |
| 50 | 6 | 0 | -7.409929  | -0.713989 | 0.122328  |
| 51 | 6 | 0 | 7.409929   | -0.713989 | -0.122327 |
| 52 | 6 | 0 | 8.366890   | 0.473296  | -0.210578 |
| 53 | 6 | 0 | 7.656452   | 1.688815  | -0.153208 |
| 54 | 6 | 0 | -7.486400  | -1.671796 | 1.308506  |
| 55 | 6 | 0 | -7.741983  | -2.984507 | 0.869396  |
| 56 | 6 | 0 | -7.866621  | -2.972680 | -0.594694 |
| 57 | 6 | 0 | -7.685976  | -1.652956 | -1.049673 |
| 58 | 6 | 0 | 7.486401   | -1.671798 | -1.308503 |
| 59 | 6 | 0 | 7.741984   | -2.984509 | -0.869391 |
| 60 | 6 | 0 | 7.866621   | -2.972679 | 0.594700  |
| 61 | 6 | 0 | 7.685975   | -1.652954 | 1.049677  |
| 62 | 6 | 0 | -8.117346  | -4.000765 | -1.503751 |
| 63 | 6 | 0 | -8.185479  | -3.693211 | -2.864253 |
| 64 | 6 | 0 | -8.006252  | -2.379313 | -3.310483 |
| 65 | 6 | 0 | -7.753670  | -1.347277 | -2.400815 |
| 66 | 6 | 0 | -7.323193  | -1.388166 | 2.656344  |
| 67 | 6 | 0 | -7.418025  | -2.435274 | 3.578838  |
| 68 | 6 | 0 | -7.670791  | -3.742280 | 3.148148  |
| 69 | 6 | 0 | -7.834736  | -4.027745 | 1.791008  |
| 70 | 6 | 0 | -8.340889  | 2.903176  | 0.216943  |
| 71 | 6 | 0 | -9.732205  | 2.886275  | 0.337569  |
| 72 | 6 | 0 | -10.432046 | 1.676331  | 0.393675  |
| 73 | 6 | 0 | -9.748295  | 0.457267  | 0.329840  |
| 74 | 6 | 0 | 9.748296   | 0.457267  | -0.329838 |
| 75 | 6 | 0 | 10.432046  | 1.676331  | -0.393673 |
| 76 | 6 | 0 | 9.732205   | 2.886274  | -0.337567 |
| 77 | 6 | 0 | 8.340889   | 2.903176  | -0.216942 |
| 78 | 6 | 0 | 7.323197   | -1.388171 | -2.656342 |
| 79 | 6 | 0 | 7.418030   | -2.435280 | -3.578834 |
| 80 | 6 | 0 | 7.670796   | -3.742285 | -3.148141 |
| 81 | 6 | 0 | 7.834740   | -4.027748 | -1.791000 |
| 82 | 6 | 0 | 8.117344   | -4.000762 | 1.503760  |
| 83 | 6 | 0 | 8.185476   | -3.693206 | 2.864261  |
| 84 | 6 | 0 | 8.006248   | -2.379307 | 3.310488  |
| 85 | 6 | 0 | 7.753667   | -1.347273 | 2.400818  |

|     |   |   |            |           |           |
|-----|---|---|------------|-----------|-----------|
| 86  | 1 | 0 | 0.000000   | -1.442839 | -0.000004 |
| 87  | 1 | 0 | -5.219050  | 3.282754  | -0.043064 |
| 88  | 1 | 0 | -4.719215  | -1.670029 | -0.046508 |
| 89  | 1 | 0 | 0.217792   | 6.198927  | -1.196820 |
| 90  | 1 | 0 | -1.549798  | 7.451376  | -2.344440 |
| 91  | 1 | 0 | -3.853078  | 6.503460  | -2.517365 |
| 92  | 1 | 0 | -4.307853  | 4.266315  | -1.590935 |
| 93  | 1 | 0 | -2.005216  | -4.412490 | -2.293748 |
| 94  | 1 | 0 | -2.101588  | -4.412000 | 2.005656  |
| 95  | 1 | 0 | 4.307854   | 4.266314  | 1.590932  |
| 96  | 1 | 0 | 3.853079   | 6.503460  | 2.517362  |
| 97  | 1 | 0 | 1.549800   | 7.451376  | 2.344438  |
| 98  | 1 | 0 | -0.217792  | 6.198927  | 1.196819  |
| 99  | 1 | 0 | 5.219050   | 3.282754  | 0.043064  |
| 100 | 1 | 0 | 4.719214   | -1.670030 | 0.046508  |
| 101 | 1 | 0 | 2.101593   | -4.411997 | -2.005665 |
| 102 | 1 | 0 | 2.005207   | -4.412493 | 2.293738  |
| 103 | 1 | 0 | -8.258053  | -5.022100 | -1.162389 |
| 104 | 1 | 0 | -8.380836  | -4.482223 | -3.584157 |
| 105 | 1 | 0 | -8.064119  | -2.159247 | -4.372005 |
| 106 | 1 | 0 | -7.613030  | -0.325987 | -2.741468 |
| 107 | 1 | 0 | -7.125827  | -0.372216 | 2.984617  |
| 108 | 1 | 0 | -7.294929  | -2.232388 | 4.638235  |
| 109 | 1 | 0 | -7.741303  | -4.543289 | 3.877816  |
| 110 | 1 | 0 | -8.031140  | -5.043874 | 1.461840  |
| 111 | 1 | 0 | -7.802868  | 3.845562  | 0.174241  |
| 112 | 1 | 0 | -10.277542 | 3.823875  | 0.388616  |
| 113 | 1 | 0 | -11.513544 | 1.683491  | 0.487468  |
| 114 | 1 | 0 | -10.285903 | -0.485219 | 0.372968  |
| 115 | 1 | 0 | 10.285903  | -0.485219 | -0.372966 |
| 116 | 1 | 0 | 11.513544  | 1.683491  | -0.487466 |
| 117 | 1 | 0 | 10.277542  | 3.823874  | -0.388615 |
| 118 | 1 | 0 | 7.802867   | 3.845562  | -0.174241 |
| 119 | 1 | 0 | 7.125830   | -0.372222 | -2.984616 |
| 120 | 1 | 0 | 7.294934   | -2.232396 | -4.638231 |
| 121 | 1 | 0 | 7.741309   | -4.543295 | -3.877807 |
| 122 | 1 | 0 | 8.031142   | -5.043877 | -1.461830 |
| 123 | 1 | 0 | 8.258053   | -5.022097 | 1.162399  |
| 124 | 1 | 0 | 8.380832   | -4.482217 | 3.584166  |
| 125 | 1 | 0 | 8.064114   | -2.159239 | 4.372010  |
| 126 | 1 | 0 | 7.613026   | -0.325982 | 2.741470  |

|     |   |   |           |           |           |
|-----|---|---|-----------|-----------|-----------|
| 127 | 1 | 0 | 2.355611  | -1.929516 | -1.988742 |
| 128 | 1 | 0 | 2.259246  | -1.928962 | 2.288664  |
| 129 | 1 | 0 | 1.913388  | -5.646765 | 0.140951  |
| 130 | 1 | 0 | -2.259253 | -1.928959 | -2.288669 |
| 131 | 1 | 0 | -2.355605 | -1.929518 | 1.988736  |
| 132 | 1 | 0 | -1.913391 | -5.646765 | -0.140963 |

---

**Table S8.** Vertical excitation energies for the singlet and triplet excited states estimated using the SCS-CC2/cc-pVDZ method.

| Compound      | Transition                     | Wavelength (nm) | Energy (eV) |
|---------------|--------------------------------|-----------------|-------------|
| <b>DB-SF1</b> | S <sub>0</sub> -S <sub>1</sub> | 393.76          | 3.1491      |
|               | S <sub>0</sub> -T <sub>1</sub> | 414.27          | 2.9932      |
|               | S <sub>0</sub> -T <sub>2</sub> | 395.93          | 3.1319      |
| <b>DB-SF2</b> | S <sub>0</sub> -S <sub>1</sub> | 394.57          | 3.1427      |
|               | S <sub>0</sub> -T <sub>1</sub> | 406.34          | 3.0516      |
|               | S <sub>0</sub> -T <sub>2</sub> | 398.39          | 3.1125      |

**Table S9.** Emission profiles of the emitters in different solvents and PMMA host.

| Solvent         | DB-SF1                 |                  | DB-SF2                 |                  |
|-----------------|------------------------|------------------|------------------------|------------------|
|                 | $\lambda_{em}$<br>(nm) | FWHM<br>(nm/meV) | $\lambda_{em}$<br>(nm) | FWHM<br>(nm/meV) |
| Hexane          | 453                    | 18/108           | 451                    | 17/104           |
| Toluene         | 461                    | 22/130           | 457                    | 21/125           |
| Isopropyl ether | 459                    | 22/129           | 455                    | 22/129           |
| Ethyl ether     | 465                    | 31/177           | 459                    | 29/171           |
| Tetrahydrofuran | 465                    | 27/153           | 461                    | 25/148           |
| Dichloromethane | 474                    | 34/186           | 469                    | 33/184           |
| PMMA            | 469                    | 35/201           | 464                    | 31/174           |

**Table S10.** Summary of the non-sensitized device data.

| Device<br>(emitter) | Doping<br>ratio | $V_{on}^a$<br>(V) | $\lambda_{EL}^b$<br>(nm) | FWHM <sup>c</sup><br>(nm) | $L_{max}^d$<br>(cd m <sup>-2</sup> ) | $CE_{max}^e$<br>(cd A <sup>-1</sup> ) | $EQE_{max/1000}^f$<br>(%) | CIE <sup>g</sup><br>(x, y) |
|---------------------|-----------------|-------------------|--------------------------|---------------------------|--------------------------------------|---------------------------------------|---------------------------|----------------------------|
| <b>DB-SF1</b>       | 1%              | 2.8               | 461                      | 22                        | 21520                                | 18.9                                  | 22.8/5.4                  | (0.14,0.09)                |
|                     | 2%              | 2.8               | 462                      | 23                        | 25663                                | 24.5                                  | 27.5/6.2                  | (0.14,0.10)                |
|                     | 5%              | 2.8               | 464                      | 24                        | 18911                                | 34.5                                  | 32.2/6.1                  | (0.13,0.12)                |
|                     | 8%              | 2.8               | 464                      | 28                        | 16817                                | 35.7                                  | 31.4/5.2                  | (0.13,0.14)                |
| <b>DB-SF2</b>       | 1%              | 2.8               | 459                      | 21                        | 27260                                | 23.6                                  | 33.0/11.7                 | (0.14,0.08)                |
|                     | 2%              | 2.8               | 459                      | 22                        | 30861                                | 27.7                                  | 36.9/15.4                 | (0.14,0.08)                |
|                     | 5%              | 2.8               | 460                      | 22                        | 34851                                | 31.6                                  | 39.0/20.7                 | (0.13,0.09)                |
|                     | 8%              | 2.8               | 462                      | 35                        | 32236                                | 40.9                                  | 38.2/17.2                 | (0.13,0.13)                |

<sup>a)</sup> Turn-on voltage recorded at the luminance of 1 cd m<sup>-2</sup>; <sup>b)</sup> maximum EL wavelength; <sup>c)</sup> FWHM of EL spectra;

<sup>d)</sup> maximum brightness; <sup>e)</sup> maximum current efficiency; <sup>f)</sup> efficiency at maximum and 1000 cd m<sup>-2</sup>; <sup>g)</sup> EL color coordinates in the CIE 1931 chromaticity diagram recorded at 6 V.

**Table S11.** Summary of reported binary deep-blue TADF OLED with CIE<sub>y</sub> < 0.12.

| Emitter               | Host          | $\lambda_{EL}$<br>(nm) | FWHM<br>(nm) | EQE <sub>max/100/1000</sub><br>(%) | CIE<br>(x, y)   | Ref.                                                          |
|-----------------------|---------------|------------------------|--------------|------------------------------------|-----------------|---------------------------------------------------------------|
| (R/S)-DOBN            | 2,6-DczPPy    | 459                    | 38           | 23.9/12.5/8.6                      | 0.14, 0.10      | <i>Adv. Mater.</i> <b>2022</b> , 34, 2204253.                 |
| (R/S)-DOBNT           | 2,6-DczPPy    | 464                    | 35           | 25.6/13.9/8.6                      | 0.13, 0.12      | <i>Adv. Mater.</i> <b>2022</b> , 34, 2204253.                 |
| QA-1                  | PPCz          | 455                    | 49           | 17.1/-/-                           | 0.14, 0.12      | <i>Angew. Chem. Int. Ed.</i> <b>2021</b> , 60, 7643-7648.     |
| SPXZPO                | mCP           | 448                    | -            | 6.3/4.5/1.8                        | 0.16, 0.12      | <i>Chem. Mater.</i> <b>2016</b> , 28, 5667.                   |
| m- <i>v</i> -DABNA    | DBFPO         | 471                    | 18           | 36.2/-/-                           | 0.12, 0.12      | <i>Chem. Eng. J.</i> <b>2022</b> , 432, 134381.               |
| 4F- <i>v</i> -DABNA   | DBFPO         | 464                    | 18           | 35.8/-/-                           | 0.13, 0.08      | <i>Chem. Eng. J.</i> <b>2022</b> , 432, 134381.               |
| 4F-m- <i>v</i> -DABNA | DBFPO         | 461                    | 18           | 33.7/-/-                           | 0.13, 0.06      | <i>Chem. Eng. J.</i> <b>2022</b> , 432, 134381.               |
| DTPPI                 | CBP           | 452                    | -            | 6.3/-/4.5                          | 0.15, 0.12      | <i>Adv. Funct. Mater.</i> <b>2022</b> , 2112969               |
| CTPPI                 | CBP           | 396                    | -            | 7.9/-/3.9                          | 0.16, 0.04      | <i>Adv. Funct. Mater.</i> <b>2022</b> , 2112969               |
| CBPI                  | CBP           | 428                    | -            | 5.4/-/2.6                          | 0.15, 0.06      | <i>Adv. Funct. Mater.</i> <b>2022</b> , 2112969               |
| <i>v</i> -DABNA       | DOBNA-<br>Oar | 469                    | 18           | 34.4/32.8/26.0                     | 0.12, 0.11      | <i>Nat. Photonics.</i> <b>2019</b> , 13, 678.                 |
| DABNA-NP-TB           | DOBNA-<br>Tol | 457                    | 33           | 19.5/17.5/12.0                     | 0.14, 0.11      | <i>Angew. Chem. Int. Ed.</i> <b>2021</b> , 60, 2882-2886.     |
| CzPh-CNNPI            | CBP           | 436                    | 72           | 9.0/-/3.1                          | 0.155,<br>0.102 | <i>Adv. Funct. Mater.</i> <b>2020</b> , 30, 2002323.          |
| N-DABNA-O-Me          | DOBNA-<br>Tol | 465                    | 23           | 29.5/23.8/22.1                     | 0.13, 0.10      | <i>Angew. Chem. Int. Ed.</i> <b>2021</b> , 60, 17910 – 17914. |
| 4                     | DPEPO         | 455                    | -            | 16.0/12.3/-                        | 0.141,<br>0.099 | <i>Adv. Opt. Mater.</i> <b>2018</b> , 6, 1800385.             |
| 5                     | DPEPO         | 449                    | -            | 9.3/4.1/-                          | 0.151,<br>0.058 | <i>Adv. Opt. Mater.</i> <b>2018</b> , 6, 1800385.             |



|                      |       |     |    |                  |                 |                                                                   |
|----------------------|-------|-----|----|------------------|-----------------|-------------------------------------------------------------------|
| <b>Cz-TRZ3</b>       | DPEPO | 450 | -  | 19.2/-/-         | 0.148,<br>0.098 | <i>Angew. Chem. Int. Ed.</i> <b>2017</b> , 56, 1571-1575.         |
| <b>Cz-TRZ4</b>       | DPEPO | 450 | -  | 18.3/-/-         | 0.150,<br>0.097 | <i>Angew. Chem. Int. Ed.</i> <b>2017</b> , 56, 1571-1575.         |
| <b>TDBA-SAF</b>      | DPEPO | 456 | 55 | 28.2/24.2/17.6   | 0.142,<br>0.090 | <i>Adv. Mater.</i> <b>2020</b> , 32, 2004083.                     |
| <b>DABNA-1</b>       | mCBP  | 459 | 28 | 13.5/6.4/-       | 0.13, 0.09      | <i>Adv. Mater.</i> <b>2016</b> , 28, 2777-2781.                   |
| <b>IczCz</b>         | DPEPO | 416 | 49 | 2.3/-/-          | 0.17, 0.04      | <i>ACS Appl. Mater. Interfaces</i> <b>2017</b> , 9, 37864-37872.  |
| <b>IczAc</b>         | DPEPO | 454 | 56 | 13.7/-/-         | 0.15, 0.09      | <i>ACS Appl. Mater. Interfaces</i> <b>2017</b> , 9, 37864-37872.  |
| <b>TDBA-PAS</b>      | DPEPO | 435 | 50 | 22.35/17.99/-    | 0.155,<br>0.042 | <i>Adv. Mater.</i> <b>2022</b> , 34, 2200537                      |
| <b>TDBA-DPAC</b>     | DPEPO | 450 | 60 | 24.61/11.03/2.42 | 0.148,<br>0.085 | <i>Adv. Mater.</i> <b>2022</b> , 34, 2200537                      |
| <b>Ban-(3,5)-CF3</b> | CBP   | 435 | 66 | 5.0/-/-          | 0.156,<br>0.083 | <i>J. Mater. Chem. C</i> <b>2013</b> , 1, 8117- 8127.             |
| <b>Icz-DPS</b>       | DPEPO | 435 | -  | 11.6/-/10.9      | 0.15, 0.08      | <i>ACS Appl. Mater. Interfaces</i> <b>2021</b> , 13, 57713-57724. |
| <b>pDTCz-DPS</b>     | PPT   | 428 | -  | 2.7/2.6/ -       | 0.15, 0.08      | <i>J. Mater. Chem. C</i> <b>2019</b> , 7, 6664-6671.              |
| <b>pDTCz-DPS</b>     | DPEPO | 425 | -  | 4.6/3.2/ -       | 0.15, 0.08      | <i>J. Mater. Chem. C</i> <b>2019</b> , 7, 6664-6671.              |
| <b>DTC-mBPSB</b>     | DPEPO | 440 | -  | 5.5/-/-          | 0.15, 0.08      | <i>Chem. Commun.</i> <b>2015</b> , 51, 16353.                     |
| <b>CNICCz</b>        | DPEPO | 449 | 56 | 12.4/6.4/-       | 0.15, 0.08      | <i>J. Mater. Chem. C</i> <b>2018</b> , 6, 5012-5017.              |
| <b>PXB-mIC</b>       | PPBI  | 450 | -  | 12.5/-/5.2       | 0.15, 0.08      | <i>ACS Appl. Mater. Interfaces</i> <b>2019</b> , 11, 14909-14916. |
| <b>PPINCz-Cz</b>     | CBP   | 430 | -  | 9.9/-/-          | 0.15, 0.08      | <i>J. Mater. Chem. C</i> <b>2021</b> , 9, 15683- 15697.           |

|                       |       |     |    |                |                 |                                                           |
|-----------------------|-------|-----|----|----------------|-----------------|-----------------------------------------------------------|
| <b>BOBO-Z</b>         | mCBP  | 445 | 18 | 13.6/9.8/3.3   | 0.15, 0.04      | <i>Adv. Mater.</i> <b>2022</b> , 34, 2107951.             |
| <b>BOBS-Z</b>         | mCBP  | 456 | 23 | 26.9/24.0/15.0 | 0.14, 0.06      | <i>Adv. Mater.</i> <b>2022</b> , 34, 2107951.             |
| <b>BSBS-Z</b>         | mCBP  | 463 | 22 | 26.8/24.0/15.9 | 0.13, 0.08      | <i>Adv. Mater.</i> <b>2022</b> , 34, 2107951.             |
| <b>PAB</b>            | mCP   | 456 | 31 | 14.7/-/<2      | 0.145,<br>0.076 | <i>Org. Electron.</i> <b>2021</b> , 97, 106275.           |
| <b>2tPAB</b>          | mCP   | 456 | 27 | 16.8/-/<2      | 0.145,<br>0.076 | <i>Org. Electron.</i> <b>2021</b> , 97, 106275.           |
| <b>3tPAB</b>          | mCP   | 460 | 26 | 19.3/-/<2      | 0.141,<br>0.076 | <i>Org. Electron.</i> <b>2021</b> , 97, 106275.           |
| <b>DIDOBNA-N</b>      | TSPO1 | 429 | 70 | 15.2/3.8/-     | 0.152,<br>0.073 | <i>Adv. Mater.</i> <b>2023</b> , 35, 2300997              |
| <b>MesB-DIDOBNA-N</b> | TSPO1 | 405 | 31 | 13.6/-/-       | 0.165,<br>0.055 | <i>Adv. Mater.</i> <b>2023</b> , 35, 2300997              |
| <b>tBDCz-DPS</b>      | DPEPO | 423 | -  | 9.9/-/-        | 0.15, 0.07      | <i>J. Am. Chem. Soc.</i> <b>2012</b> , 134, 14706-14709.  |
| <b>DCzBN1</b>         | DPEPO | 418 | 65 | 2.5/0.1/-      | 0.151,<br>0.047 | <i>Adv. Funct. Mater.</i> <b>2018</b> , 28, 1706023.      |
| <b>DCzBN2</b>         | DPEPO | 436 | 66 | 7.7/3.3/-      | 0.153,<br>0.069 | <i>Adv. Funct. Mater.</i> <b>2018</b> , 28, 1706023.      |
| <b>DCzBN3</b>         | DPEPO | 428 | 65 | 10.3/5.4/-     | 0.156,<br>0.063 | <i>Adv. Funct. Mater.</i> <b>2018</b> , 28, 1706023.      |
| <b>NOBNacene</b>      | TSPO1 | 412 | 41 | 11.2/-/-       | 0.176,<br>0.068 | <i>Angew. Chem. Int. Ed.</i> <b>2023</b> , 62, e202215522 |
| <b>CZ2CO</b>          | mCP   | 445 | 23 | 13/9.9/3.9     | 0.154,<br>0.061 | <i>Angew. Chem. Int. Ed.</i> <b>2023</b> , 62, e202215226 |
| <b>CZCO</b>           | mCP   | 432 | 35 | 15.6/6/5.9     | 0.154,<br>0.047 | <i>Angew. Chem. Int. Ed.</i> <b>2023</b> , 62, e202215226 |

|                |       |     |    |              |                 |                                                                   |
|----------------|-------|-----|----|--------------|-----------------|-------------------------------------------------------------------|
| <b>PyINA</b>   | PIMNA | 432 | -  | 5.1/5.1/4.7  | 0.156,<br>0.060 | <i>ACS Appl. Mater. Interfaces</i><br><b>2016</b> ,8,28771-28779. |
| <b>TDBA-Ac</b> | PPBI  | 448 | 48 | 21.5/-/9.7   | 0.15, 0.06      | <i>Nat. Photonics</i> <b>2019</b> , 13, 540-546.                  |
| <b>BD1</b>     | CBP   | 424 | 44 | 8.9/4.3/3.7  | 0.16, 0.05      | <i>Adv. Funct.Mater.</i> <b>2014</b> , 24, 2064–2071              |
| <b>BD2</b>     | CBP   | 430 | 47 | 9.5/5.2/4.0  | 0.15, 0.06      | <i>Adv. Funct.Mater.</i> <b>2014</b> , 24, 2064–2071              |
| <b>BD3</b>     | CBP   | 432 | 45 | 12.0/5.3/4.2 | 0.15, 0.06      | <i>Adv. Funct.Mater.</i> <b>2014</b> , 24, 2064–2071              |
| <b>TB-tCz</b>  | mCP   | 412 | 44 | 15.9/-/-     | 0.17, 0.06      | <i>Adv. Funct. Mater.</i> <b>2021</b> , 31, 2102588               |
| <b>TB-tPCz</b> | mCP   | 420 | 44 | 14.1/-/-     | 0.17, 0.05      | <i>Adv. Funct. Mater.</i> <b>2021</b> , 31, 2102588               |
| <b>TPIBCz</b>  | CBP   | 432 | -  | 5.5/-/-      | 0.156,<br>0.047 | <i>Chem. Sci.</i> <b>2017</b> , 8, 3599-3608.                     |
| <b>TPINCz</b>  | CBP   | 440 | -  | 7.0/-/6.6    | 0.153,<br>0.059 | <i>Chem. Sci.</i> <b>2017</b> , 8, 3599-3608.                     |
| <b>TPIBNCz</b> | CBP   | 428 | -  | 6.0/-/-      | 0.157,<br>0.051 | <i>Chem. Sci.</i> <b>2017</b> , 8, 3599-3608.                     |
| <b>B-O-dpa</b> | DPEPO | 443 | 32 | 16.3/2.2/-   | 0.15, 0.05      | <i>ACS Appl Mater Interfaces</i> <b>2021</b> , 13,<br>45798.      |
| <b>DSiTPI</b>  | CzSi  | 396 | 47 | 7.4/5.0/-    | 0.16, 0.05      | <i>Adv. Opt. Mater.</i> <b>2021</b> , 9, 2100965.                 |
| <b>CSiTPI</b>  | CzSi  | 382 | 46 | 5.2/4.4/-    | 0.16, 0.05      | <i>Adv. Opt. Mater.</i> <b>2021</b> , 9, 2100965.                 |
| <b>3a</b>      | CBP   | 422 | 54 | 3.0/-/-      | 0.15, 0.046     | <i>J. Mater. Chem. C</i> <b>2021</b> , 9, 260-269.                |
| <b>3b</b>      | CBP   | 422 | 58 | 3.0/-/-      | 0.15, 0.049     | <i>J. Mater. Chem. C</i> <b>2021</b> , 9, 260-269.                |
| <b>3c</b>      | CBP   | 423 | 59 | 3.0/-/-      | 0.15, 0.043     | <i>J. Mater. Chem. C</i> <b>2021</b> , 9, 260-269.                |
| <b>DMACN-B</b> | DPEPO | 444 | 44 | 10.0/-/-     | 0.151,<br>0.045 | <i>Adv. Funct. Mater.</i> <b>2021</b> , 31, 2009488               |
| <b>BIC-mCz</b> | DBFPO | 431 | 38 | 7.0/-/-      | 0.16, 0.04      | <i>Angew. Chem. Int. Ed.</i> <b>2022</b> , 61,<br>e202206916.     |
| <b>mDBIC</b>   | DBFPO | 433 | 34 | 5.7/-/-      | 0.16, 0.04      | <i>Angew. Chem. Int. Ed.</i> <b>2022</b> , 61,                    |

|                  |               |     |    |                |                 |                                                               |
|------------------|---------------|-----|----|----------------|-----------------|---------------------------------------------------------------|
|                  |               |     |    |                |                 | e202206916.                                                   |
| <b>POPCN-2CP</b> | mCP           | 404 | 51 | 7.9/7.7/6.2    | 0.159,<br>0.031 | <i>Angew. Chem. Int. Ed.</i> <b>2022</b> , 61,<br>e202116810. |
| <b>POPCN-2CP</b> | DBFPO         | 404 | 50 | 8.2/7.9/5.7    | 0.161,<br>0.034 | <i>Angew. Chem. Int. Ed.</i> <b>2022</b> , 61,<br>e202116810. |
| <b>5</b>         | mCPPO1        | 412 | -  | 3.1/-/-        | 0.16, 0.024     | <i>J. Mater. Chem. C</i> , <b>2014</b> , 2, 9083–9086         |
| <b>TFPy2</b>     | mCP           | 414 | 51 | 3.8/-/-        | 0.15, 0.03      | <i>Adv. Opt. Mater.</i> <b>2020</b> , 8, 2001074.             |
| <b>TFPy3</b>     | mCP           | 406 | 50 | 4.8/-/-        | 0.16, 0.02      | <i>Adv. Opt. Mater.</i> <b>2020</b> , 8, 2001074.             |
| <b>TFPy4</b>     | mCP           | 404 | 54 | 5.1/-/-        | 0.16, 0.02      | <i>Adv. Opt. Mater.</i> <b>2020</b> , 8, 2001074.             |
| <b>DB</b>        | DOBNA-<br>OAr | 443 | 26 | 23.4/17.4/9.0  | 0.154,<br>0.048 | <i>Adv. Mater.</i> <b>2023</b> , 2308314                      |
| <b>DB-O</b>      | DOBNA-<br>OAr | 445 | 24 | 27.5/21.3/11.4 | 0.150,<br>0.041 | <i>Adv. Mater.</i> <b>2023</b> , 2308314                      |
| <b>DB-S</b>      | DOBNA-<br>OAr | 447 | 24 | 29.3/23.6/12.2 | 0.148,<br>0.047 | <i>Adv. Mater.</i> <b>2023</b> , 2308314                      |
| <b>DB-SF1</b>    | SiTrzCz2      | 465 | 24 | 32.2/5.4       | 0.13,0.12       | <b>This work</b>                                              |
| <b>DB-SF2</b>    | SiTrzCz2      | 460 | 22 | 39.0/18.5      | 0.13,0.09       | <b>This work</b>                                              |

### 3. References

- 1 V. Dolomanov, L. J. Bourhis, R. J. Gildea, J. A. Howard, H. Puschmann, *J. Appl. Cryst.* **2009**, *42*, 339-341.
- 2 G. M. Sheldrick, *Acta Cryst.* **2015**, *A71*, 3-8.
- 3 G. M. Sheldrick, *Acta Cryst.* **2015**, *C71*, 3-8.
- 4 T. Lu, F. Chen, *J. Comput. Chem.* **2012**, *33*, 580-592.
- 5 Z. Liu, T. Lu, Q. Chen, *Carbon* **2020**, *165*, 461-467.
- 6 M. Kállay, P. R. Nagy, D. Mester, Z. Rolik, G. Samu, J. Csontos, J. Csóka, P. B. Szabó, L. Gyevi-Nagy, B. Hégyely, I. Ladjánszki, L. Szegedy, B. Ladóczki, K. Petrov, M. Farkas, P. D. Mezei, Á. Ganyecz, *J. Chem. Phys.* **2020**, *152*, 074107.
- 7 M. Kállay, P. R. Nagy, D. Mester, L. Gyevi-Nagy, J. Csóka, P. B. Szabó, Z. Rolik, G. Samu, J. Csontos, B. Hégyely, Á. Ganyecz, I. Ladjánszki, L. Szegedy, B. Ladóczki, K. Petrov, M. Farkas, P. D. Mezei, R. A. Horváth, MRCC, a quantum chemical program suite. See [www.mrcc.hu](http://www.mrcc.hu).
- 8 X. Gao, S. Bai, D. Fazzi, T. Niehaus, M. Barbatti, W. Thiel, *J. Chem. Theory Comput.* **2017**, *13*, 515-524.
- 9 Q. Zhang, H. Kuwabara, W. J. Pottsavage, S. Huang, Y. Hatae, T. Shibata, C. Adachi, *J. Am. Chem. Soc.* **2014**, *136*, 18070-18081.
- 10 Q. Zhang, B. Li, S. Huang, H. Nomura, H. Tanaka, C. Adachi, *Nat. Photonics* **2014**, *8*, 326-332.
- 11 T.-L. Wu, M.-J. Huang, C.-C. Lin, P.-Y. Huang, T.-Y. Chou, R.-W. Chen-Cheng, H.-W. Lin, R.-S. Liu, C.-H. Cheng, *Nat. Photonics* **2018**, *12*, 235-240.
